# Supplementary material for: New lineages of Asterochloris photobionts in Bolivian lichens, and expand our knowledge on habitat preferences and distribution of Asterochloris algae
Source: Research Square preprint supplement (doi:10.21203/rs.3.rs-109680/v1), 2020-11-20
Supplement: Supplementary file 2 [file e6a277936e2d884bf1179847.xlsx]

## Sheet: Table S1
			Table S1. List of specimens from which photobiont sequences were newly obtained with their ITS rDNA and actin type I locus GenBank accession numbers. All samples were collected in Bolivia and voucher specimens are deposited in herbaria LPB and UGDA.
Voucher	Asterochloris strain	Mycobiont species	Order	Family	Genus	Locality	Locality code	Substrate	Latitude	Longitude	Altitude	Habitat	GenBank Acc. No. of ITS rDNA marker	GenBank Acc. No. of actin type I marker	GenBank Acc, No. of rbcL
Kukwa-14684	Clade StA1	Cladonia andesita	Lecanorales	Cladoniaceae	Cladonia	La Paz, Bautista Saavedra, Área Natural de Manejo Integrado Nacional APOLOBAMBA, between la Curva and Charazani, 15º08’09”S, 69º02’03”W	La Paz 1	saxicolous,	-15.1358333	-69.03416666666666	3780	upper montane cloud forest 2	+	+
Kukwa-14695	Clade Bol 9	Lepraria aff. congesta	Lecanorales	Stereocaulaceae	Lepraria	La Paz, Bautista Saavedra, Área Natural de Manejo Integrado Nacional APOLOBAMBA, between la Curva and Charazani, 15º08’09”S, 69º02’03”W	La Paz 1	on terricolous bryophytes, muscicolous	-15.1358333	-69.03416666666666	3780	upper montane cloud forest 2	+		+
Kukwa-14785	Clade Bol 1	Cladonia ceratophylla	Lecanorales	Cladoniaceae	Cladonia	La Paz, Franz Tamayo, Área Natural de Manejo Integrado Nacional APOLOBAMBA, near Rio Pelechuco, below Pelechuco close to new road to Apolo, 14º46’59”S, 69º01’08”W	La Paz 1	saxicolous,	-14.7830556	-69.01888888888888	2750	upper montane cloud forest 1	+	+	+
Kukwa-14827	Clade Bol 8	Stereocaulon alpinum	Lecanorales	Stereocaulaceae	Stereocaulon	La Paz, Franz Tamayo, Área Natural de Manejo Integrado Nacional APOLOBAMBA, Paso Sánchez, near road Pelechuco-Keara, 14º44’41”S, 69º06’36”W	La Paz 1	saxicolous,	-14.7447222	-69.11	4780	open high Andean vegetation	+	+	+
Kukwa-14827a	Clade Bol 9	Lepraria congesta	Lecanorales	Stereocaulaceae	Lepraria	La Paz, Franz Tamayo, Área Natural de Manejo Integrado Nacional APOLOBAMBA, Paso Sánchez, near road Pelechuco-Keara, 14º44’41”S, 69º06’36”W	La Paz 1	saxicolous,	-14.7447222	-69.11	4780	open high Andean vegetation	+
Kukwa-14831	Clade Bol 11	Lepraria congesta	Lecanorales	Stereocaulaceae	Lepraria	La Paz, Franz Tamayo, Área Natural de Manejo Integrado Nacional APOLOBAMBA, Paso Sánchez, near road Pelechuco-Keara, 14º44’41”S, 69º06’36”W	La Paz 1	terricolous,	-14.7447222	-69.11	4780	open high Andean vegetation	+		+
Kukwa-14848a	Clade A6	Lepraria cryptovouauxii	Lecanorales	Stereocaulaceae	Lepraria	La Paz, Franz Tamayo, Parque Nacional y Área Natural de Manejo Integrado Madidi, road Pelechuco-Keara near the turnoff to Puina	La Paz 2	terricolous,	-14.6897222	-69.13388888888889	4370	open high Andean vegetation	+	+
Kukwa-14880a	Clade P2	Cladonia cf. subcariosa	Lecanorales	Cladoniaceae	Cladonia	La Paz, Franz Tamayo, Parque Nacional y Área Natural de Manejo Integrado Madidi, below Keara Bajo	La Paz 2	saxicolous,	-14.6944444	-69.06416666666667	3060	upper montane cloud forest 2	+
Kukwa-14886	Clade P2	Cladonia calycantha	Lecanorales	Cladoniaceae	Cladonia	La Paz, Franz Tamayo, Parque Nacional y Área Natural de Manejo Integrado Madidi, below Keara Bajo	La Paz 2	saxicolous,	-14.6944444	-69.06416666666667	3060	upper montane cloud forest 2	+		+
Kukwa-14890	Clade A14	Cladonia cf. ramulosa	Lecanorales	Cladoniaceae	Cladonia	La Paz, Franz Tamayo, Parque Nacional y Área Natural de Manejo Integrado Madidi, below Keara Bajo	La Paz 2	saxicolous,	-14.6944444	-69.06416666666667	3060	upper montane cloud forest 2	+	+	+
Kukwa-15030b	Clade StA1	Cladonia confusa f. confusa	Lecanorales	Cladoniaceae	Cladonia	Cochabamba, Carrasco, Parque Nacional Carrasco, Meruvia close to Monte Punku, 17º35’06”S, 65º14’54”W	Cochabamba 1	saxicolous,	-17.585	-65.24833333333333	3283	upper montane cloud forest 2	+
Kukwa-15040	Clade 12	Cladonia chlorophaea	Lecanorales	Cladoniaceae	Cladonia	Cochabamba, Carrasco, Parque Nacional Carrasco, Meruvia close to Monte Punku, 17º35’06”S, 65º14’54”W	Cochabamba 1	epixylic,	-17.585	-65.24833333333333	3283	upper montane cloud forest 2	+
Kukwa-15044	Clade P2	Cladonia furcata	Lecanorales	Cladoniaceae	Cladonia	Cochabamba, Carrasco, Parque Nacional Carrasco, Meruvia close to Monte Punku, 17º35’06”S, 65º14’54”W	Cochabamba 1	terricolous,	-17.585	-65.24833333333333	3283	upper montane cloud forest 2	+		+
Kukwa-15135	Clade Bol 3	Cladonia subradiata	Lecanorales	Cladoniaceae	Cladonia	Dept. Cochabamba, Prov. Carrasco, Parque Nacional Carrasco, near Rio Ibirisu, close to Sajtarumi, 17º27’09”S, 65º16’29”W, 2059 m,	Cochabamba 1	corticolous,	-17.4525	-65.27472222222222	2059	lower montane cloud forest	+
Kukwa-15186	Clade Bol 9	Lepraria congesta	Lecanorales	Stereocaulaceae	Lepraria	Cochabamba, Tiraque, Parque Nacional Carrasco, Cerro Juno, near Antenas, 17º19’27”S, 65º41’39”W	Cochabamba 1	saxicolous,	-17.3241667	-65.69416666666667	4649	open high Andean vegetation	+		+
Kukwa-15987	Clade Bol 10	Diploschistes hypoleucus	Ostropales	Graphidaceae	Diploschistes	Chuquisaca, Zudañez, Cerro Pothulo close to Icla, 19º34’29”S, 64º37’44”W	Chuquisaca 1	terricolous,	-19.5747222	-64.62888888888888	4150	open high Andean vegetation	+
Kukwa-15988	Clade Bol 10	Diploschistes hypoleucus	Ostropales	Graphidaceae	Diploschistes	Chuquisaca, Zudañez, Cerro Pothulo close to Icla, 19º34’29”S, 64º37’44”W	Chuquisaca 1	terricolous,	-19.5747222	-64.62888888888888	4150	open high Andean vegetation	+
Kukwa-16168	Clade Bol 1	Cladonia aff. ahtii	Lecanorales	Cladoniaceae	Cladonia	Chuquisaca, Zudañez, Área Natural de Manejo Integrado El Palmar, La Cascada bajo de El Palmar	Chuquisaca 2	on bark of palm log,	-18.6897222	-64.90722222222223	2740	upper montane cloud forest 1	+		+
Kukwa-16204	Clade Bol 2	Lepraria harrisiana	Lecanorales	Stereocaulaceae	Lepraria	Chuquisaca, Zudañez, Área Natural de Manejo Integrado El Palmar, La Cascada bajo de El Palmar	Chuquisaca 2	corticolous,	-18.6897222	-64.90722222222223	2740	upper montane cloud forest 1	+	+	+
Kukwa-16205	Clade 9	Cladonia granulosa	Lecanorales	Cladoniaceae	Cladonia	Chuquisaca, Zudañez, Área Natural de Manejo Integrado El Palmar, La Cascada bajo de El Palmar	Chuquisaca 2	corticolous,	-18.6897222	-64.90722222222223	2740	upper montane cloud forest 1	+		+
Kukwa-16553	Clade Bol 5	Cladonia furcata	Lecanorales	Cladoniaceae	Cladonia	Tarija, Aniceto Arce, Reserva Nacional de Flora y Fauna Tariquía, between la Cumbre and camamento los Alisos	Tarija 1	saxicolous,	-22.0438889	-64.59638888888888	2460	upper montane cloud forest 1	+		+
Kukwa-16584	Clade Bol 2	Lepraria impossibilis	Lecanorales	Stereocaulaceae	Lepraria	Dept. Tarija, Prov. Aniceto Arce, Reserva Nacional de Flora y Fauna Tariquía, campamento los Alisos, 22º01’18.9”S, 64º34’22.5”W, elev. 1900,	Tarija 1	corticolous,	-22.0219167	-64.57291666666666	1900	lower montane cloud forest	+
Kukwa-16586	Clade Bol 3	Diploschistes cf. cinereocesius	Ostropales	Graphidaceae	Diploschistes	Tarija, Aniceto Arce, Reserva Nacional de Flora y Fauna Tariquía, close to campamento los Alisos 22º01’25”S, 64º34’06”W	Tarija 1	on wood, epixylic	-22.0236111	-64.56833333333333	1900	lower montane cloud forest	+		+
Kukwa-16621	Clade StA1	Cladonia confusa f. confusa	Lecanorales	Cladoniaceae	Cladonia	Tarija, Aniceto Arce, Reserva Nacional de Flora y Fauna Tariquía, close to la Cumbre between Padcaya and campamento los Alisos, 22º00’00”S, 64º36’29”W	Tarija 1	terricolous,	-22	-64.60805555555555	3158	upper montane cloud forest 2	+	+	+
Kukwa-16828	Clade Bol 2	Lepraria impossibilis	Lecanorales	Stereocaulaceae	Lepraria	Tarija, Burnet O'Connor, la Cumbre close to Entrerios, old road between Entrerios and Tarija	Tarija 2	corticolous,	-21.4633333	-64.2233333	1943	lower montane cloud forest	+	+
Kukwa-16829	Clade A14	Lepraria cf. cryptovouauxii	Lecanorales	Stereocaulaceae	Lepraria	Tarija, Burnet O'Connor, la Cumbre close to Entrerios, old road between Entrerios and Tarija	Tarija 2	on wood,	-21.4633333	-64.22333333333333	1943	lower montane cloud forest	+		+
Kukwa-16831	Clade Bol 2	Lepraria impossibilis	Lecanorales	Stereocaulaceae	Lepraria	Tarija, Burnet O'Connor, la Cumbre close to Entrerios, old road between Entrerios and Tarija	Tarija 2	corticolous,	-21.4633333	-64.22333333333333	1943	lower montane cloud forest	+
Kukwa-16858	Clade Bol 2	Lepraria impossibilis	Lecanorales	Stereocaulaceae	Lepraria	Tarija, Burnet O'Connor, close to los Pinos, old road between Entrerios and Tarija	Tarija 2	corticolous,	-21.4138889	-64.30916666666667	2149	upper montane cloud forest 1	+	+	+
Kukwa-16907	Clade A14	Lepraria pallida	Lecanorales	Stereocaulaceae	Lepraria	Dept. Chuquisaca, Prov. Zudañez, Área Natural de Manejo Integrado El Palmar, sendero El Palmar, exposition SE, 18º41’28”S, 64º54’32”W, 2600-2876 m,	Chuquisaca 2	saxicolous,	-18.6911111	-64.9088888888889	2600	upper montane cloud forest 1	+	+	+
Kukwa-16907a	Clade Bol 12	Lepraria impossibilis	Lecanorales	Stereocaulaceae	Lepraria	Dept. Chuquisaca, Prov. Zudañez, Área Natural de Manejo Integrado El Palmar, sendero El Palmar, exposition SE, 18º41’28”S, 64º54’32”W, 2600-2876 m,	Chuquisaca 2	saxicolous,	-18.6911111	-64.9088888888889	2600	upper montane cloud forest 1	+		+
Kukwa-16909	Clade Bol 1	Cladonia aff. ahtii	Lecanorales	Cladoniaceae	Cladonia	Dept. Chuquisaca, Prov. Zudañez, Área Natural de Manejo Integrado El Palmar, sendero El Palmar, exposition SE, 18º41’28”S, 64º54’32”W, 2600-2876 m,	Chuquisaca 2	on palm,	-18.6911111	-64.9088888888889	2600	upper montane cloud forest 1	+		+
Kukwa-16911	Clade P2	Cladia aggregata	Lecanorales	Cladoniaceae	Cladia	Dept. Chuquisaca, Prov. Zudañez, Área Natural de Manejo Integrado El Palmar, sendero El Palmar, exposition SE, 18º41’28”S, 64º54’32”W, 2600-2876 m,	Chuquisaca 2	on epigeic bryophytes, muscicolous	-18.6911111	-64.9088888888889	2600	upper montane cloud forest 1	+		+
Kukwa-16915b	Clade Bol 1	Lepraria sipmaniana	Lecanorales	Stereocaulaceae	Lepraria	Dept. Tarija, Prov. Aniceto Arce, close to Cidras, 22º11’32”S, 64º31’12”W, 980 m,	Tarija 1	corticolous,	-22.1922222	-64.52	980	lower montane cloud forest	+
Kukwa-16941	Clade Bol 1	Lepraria sipmaniana	Lecanorales	Stereocaulaceae	Lepraria	Dept. Tarija, Prov. Burnet O'Connor, close to Soledad, old road between Entrerios and Chuquiaca, 21º39’45”S, 64º07’22”W, 1750 m,	Tarija 2	corticolous,	-21.6625	-64.12277777777777	1750	lower montane cloud forest	+
Kukwa-18069	Asterochloris friedlii	Lepraria achariana	Lecanorales	Stereocaulaceae	Lepraria	Dept. Cochabamba, Prov. Carrasco, Parque Nacional Carrasco, Meruvia, 17º34’43”S, 65º15'19"W, elev. 3120 m,	Cochabamba 1	corticolous,	-17.5786111	-65.25527777777778	3120	upper montane cloud forest 2	+		+
Kukwa-18470	Clade Bol 1	Cladonia ceratophylla	Lecanorales	Cladoniaceae	Cladonia	Dept. Santa Cruz, Prov. Manuel María Caballero, near Siberia, 17º50’38"S, 64º42'20"W, elev. 2635 m,	Santa Cruz 1	corticolous,	-17.8438889	-64.70555555555556	2635	upper montane cloud forest 1	+	+	+
Kukwa-19459	Asterochloris friedlii	Lepraria finkii	Lecanorales	Stereocaulaceae	Lepraria	Dept. Santa Cruz, Prov. Comarapa, Parque Nacional y Área Natural de Manejo Integrado Amboró, Remate, 17°51'39”S, 64°21'15”W, elev. 2270 m,	Santa Cruz 1	corticolous,	-17.8608333	-64.35416666666666	2270	upper montane cloud forest 1	+		+
Kukwa-19468	Clade L54	Lepraria aff. hodkinsoniana	Lecanorales	Stereocaulaceae	Lepraria	Dept. Santa Cruz, Prov. Comarapa, Parque Nacional y Área Natural de Manejo Integrado Amboró, Remate, 17°51'39”S, 64°21'15”W, elev. 2270 m,	Santa Cruz 1	corticolous,	-17.8608333	-64.35416666666666	2270	upper montane cloud forest 1	+	+	+
Kukwa-19499	Clade Bol 7	Lepraria impossibilis	Lecanorales	Stereocaulaceae	Lepraria	Dept. Santa Cruz, Prov. Comarapa, Parque Nacional y Área Natural de Manejo Integrado Amboró, Remate, 17°51'39”S, 64°21'15”W, elev. 2270 m,	Santa Cruz 1	corticolous,	-17.8608333	-64.35416666666666	2270	upper montane cloud forest 1	+	+	+
UGDA-L-18552	Vulcanochloris canariensis	Stereocaulon pityryzans	Lecanorales	Stereocaulaceae	Stereocaulon	Dep. Santa Cruz, Prov. Andrez Ibenez, Parque Nacional Amboro, on the road to San Mateo de Toresilla village, old road between Cochabamba and Comarapa, 17_49'10''S, 64_38'45''W	-	saxicolous,	-17.8194444	-64.64583333333334	2950	upper montane cloud forest 2	+
UGDA-L-18555	Clade Bol 6	Stereocaulon microcarpum	Lecanorales	Stereocaulaceae	Stereocaulon	Dep. La Paz, Prov. Larecja, near Consata village 15_20'46''S, 68_29'16''W	La Paz 3	saxicolous,	-15.3461111	-68.48777777777778	1240	lower montane cloud forest	+
UGDA-L-18556	Clade Bol 13	Lepraria achariana	Lecanorales	Stereocaulaceae	Lepraria	Dept. Santa Cruz, Prov. Manuel María Caballero, near Siberia, Monte Empalme, 17º50’05"S, 64º42'09"W, elev. 2445 m,	Santa Cruz 1	corticolous,	-17.8347222	-64.7025	2445	upper montane cloud forest 1	+
UGDA-L-18566	Asterochloris mediterraena	Stereocaulon pachycephalum	Lecanorales	Stereocaulaceae	Stereocaulon	Dep. La Paz, Prov. Nor Yungas, near Pongo village, near the road between Coroico and La Paz 16_19'28''S, 67_57'21''W	La Paz 4	saxicolous	-16.3244444	-67.95583333333333	3820	upper montane cloud forest 2	+
UGDA-L-18613	Clade P2	Stereocaulon myriocarpum	Lecanorales	Stereocaulaceae	Stereocaulon	Dep. La Paz, Prov.Murillo, Valle del Zongo 16_11'54''S, 68_07'33''W	La Paz 4	terricolous,	-16.1983333	-68.12583333333333	3860	upper montane cloud forest 2	+		+
UGDA-L-18961	Asterochloris mediterraena	Cladonia calycantha	Lecanorales	Cladoniaceae	Cladonia	Dep. La Paz, Prov. Saavedra, 196kkm on the road from Apolo to Charazani villages, 15km from Charazani, 15_11'02''S, 68_53'43''W	La Paz 3	terricolous,	-15.1838889	-68.89527777777778	2560	upper montane cloud forest 1	+
UGDA-L-18963	Clade StA5	Cladonia pocillum	Lecanorales	Cladoniaceae	Cladonia	Dep. La Paz, Prov. Camacho, 15_25'53''S, 69_05'07''W	La Paz 5	terricolous,	-15.4313889	-69.08527777777778	4250	open high Andean vegetation	+
UGDA-L-18987	Clade P2	Cadonia melanopoda	Lecanorales	Cladoniaceae	Cladonia	dept. La Paz, Nor Yungas, near Pongo village	La Paz 4	terricolous,	-16.3077778	-67.95583333333333	3820	upper montane cloud forest 2	+
UGDA-L-18992	Clade StA1	Cladonia isabellina	Lecanorales	Cladoniaceae	Cladonia	Dep. La Paz, Prov Nor Yungas, near Chuspipata village, on the road between Coroico and La Paz, 16_19'28''S, 67_57'21''W	La Paz 4	terricolous,	-16.3244444	-67.95583333333333	3820	upper montane cloud forest 2	+
UGDA-L-18999	Clade S1	Cladonia didyma	Lecanorales	Cladoniaceae	Cladonia	Dep. La Paz, Prov Nor Yungas, Parque National y Area Natural de Manejo Intergrado Cotapata, by Sillu Tincara pre-Columbian riute, 16_17'22''S, 67_53'29''W	La Paz 2	terricolous,	-16.2894444	-67.8913888888889	3520	upper montane cloud forest 2	+		+
UGDA-L-19004	Clade P2	Cladonia didyma	Lecanorales	Cladoniaceae	Cladonia	Dep. La Paz,	La Paz 4	saxicolous	-16.1280556	-68.09861111111111	2450	upper montane cloud forest 1	+
UGDA-L-19009	Clade 9	Cladonia arcuata	Lecanorales	Cladoniaceae	Cladonia	Dep. Santa Cruz, Prov. Florida, Parque Nacional Amboro, above la Yungas village 18_03'30''S, 63_54'36''W	Santa Cruz 2	terricolous,	-18.0583333	-63.91	2330	upper montane cloud forest 1	+
UGDA-L-19015	Clade 9	Cladonia dactylota	Lecanorales	Cladoniaceae	Cladonia	Dep. Santa Cruz, Prov. Andrez Ibenez, Parque Nacional Amboro, on the road to San Mateo de Toresilla village, old road between Cochabamba and Comarapa, 17_48'11''S, 64_39'28''W	Santa Cruz 1	terricolous,	-17.8030556	-64.65777777777778	2250	upper montane cloud forest 1	+		+
UGDA-L-19021	Clade P2	Cladonia arbuscula subsp. boliviana	Lecanorales	Cladoniaceae	Cladonia	Dept. Santa Cruz 17_49'10''S, 64_38'45''W	Santa Cruz 1	terricolous,	-17.8194444	-64.64583333333334	2950	upper montane cloud forest 2	+		+
UGDA-L-25173	Clade S1	Stereocaulon tomentosum	Lecanorales	Stereocaulaceae	Stereocaulon	Dep. Santa Cruz 17_50'15''S, 64_42'36''W	Santa Cruz 1	saxicolous	-17.8375	-64.71000000000001	2700	upper montane cloud forest 1	+
UGDA-L-25175	Asterochloris mediterraena	Stereocaulon tomentosum	Lecanorales	Stereocaulaceae	Stereocaulon	Dep. Cochabamba, Prov. Carrasco, PN Carrasco, Koricaza, 17_33'21''S, 65_16'29''W	Cochabamba 1	terricolous	-17.5558333	-65.27472222222222	2950	upper montane cloud forest 2	+	+

## Sheet: Table S2
sequence name	actin accession number	algal ITS accession number	rbcL accession number	Asterochloris species/lineage	Mycobiont species	locality	substrate	latitude	longitude	altitude
2015KGIC037A	MT073203	MT036569	MT090153	Asterochloris stereocaulonicola	Stereocaulon alpinum	King George Island	NA	−62.131230	−58.458890	0
2015KGIC037B	MT073205	MT036571	MT090155	Asterochloris stereocaulonicola	Stereocaulon alpinum	Antarctica, King George Island	NA	−62.131230	−58.458890	0
2015KGIC037D	MT073204	MT036570	MT090154	Asterochloris stereocaulonicola	Stereocaulon alpinum	King George Island	NA	−62.131230	−58.458890	0
2015KGS006A	MT073200	MT036566	MT090150	Asterochloris pseudoirregularis	Cladonia sp.	King George Island	NA	−62.131490	−58.459550	0
2015KGS010C	MT073199	MT036565	MT090149	Asterochloris pseudoirregularis	Cladonia gracilis	King George Island	NA	−62.131490	−58.459550	0
2015KGS049A	MT073207	MT036573	MT090157	Asterochloris antarctica	Cladonia sp.	Antarctica, King George Island	NA	−62.135100	−58.467100	0
2015KGS063A	MT073208	MT036574	MT090158	Asterochloris antarctica	Cladonia sp.	Antarctica, King George Island	NA	−62.135100	−58.467100	0
2015KGS064C	MT073201	MT036567	MT090151	Asterochloris pseudoirregularis	Cladonia sp.	King George Island	NA	−62.131490	−58.459550	0
2015KGS085A	MT073209	MT036575	MT090159	Asterochloris antarctica	Cladonia sp.	Antarctica, King George Island	NA	−62.135100	−58.467100	0
2016KGIC018A	MT073210	MT036576	MT090160	Asterochloris antarctica	Cladonia sp.	Antarctica, King George Island	NA	−62.135100	−58.467100	0
2016KGIC019A	MT073202	MT036568	MT090152	Asterochloris pseudoirregularis	Cladonia sp.	King George Island	NA	−62.131490	−58.459550	0
AM906021/Peksa 235	AM906021	AM905995	KP318699	Asterochloris friedlii	Lepraria caesioalba	Slovakia, Slovenské Rudohorie Mts, Klenovský Vepor Mt.	muscicolous	48.691	19.764	998
AM906030/ ccap519 5b	AM906030	AM906001	AJ969632	Asterochloris italiana	Xanthoria parietina	Italy	NA	NA	NA	NA
Bayerova 3401	AM906045	AM900492	KP318698	Asterochloris woessiae	Lepraria borealis	Bulgaria, Stara planina Mts	saxicolous	42.653028	24.8065	494
DQ229891/ Talbot 101	DQ229891	DQ229887		Clade 12	Stereocaulon paschale	USA, Alaska, Riverside	terricolous	63.161183	-142.114083	511
DQ229892/ Nelsen 3950	DQ229892	DQ229878		Asterochloris lobophora	Lepraria finkii	USA, Wisconsin, Patterson Hemlocks State Natural Area, Minocqua	corticolous	45.897558	-89.9625	485
DQ229893/ Talbot 400	DQ229893	DQ229882		Clade StA4	Stereocaulon paschale	USA, Alaska, Aleutians East	muscicolous	54.90003	-159.2666	49
DQ229895	DQ229895	DQ229883		Clade P2	Pilophorus cf. cereolus	San José, Costa Rica	NA	9.864167	-84.026686	1542
DQ229898/ Nelsen 3974	DQ229898	DQ229877		Asterochloris friedlii	Lepraria finkii	USA, Wisconsin, Ridgeway Township	corticolous	42.98942	-90.009868	349
EU008696	EU008696	EU008663		Asterochloris friedlii	Lepraria caesioalba	USA	NA	NA	NA	NA
EU008706	EU008706	EU008677		Asterochloris friedlii	Lepraria lobificans	USA	NA	NA	NA	NA
EU008710	EU008710	EU008681		clade A6	Lepraria nigrocincta	Costa Rica	NA	NA	NA	NA
EU008711	EU008711	EU008684		Clade L54	Lepraria sp.	Costa Rica, Cartago	terricolous	9.716609	-83.849965	2071
EU008714	EU008714	EU008687		clade A6	Lepraria sp.	Costa Rica	NA	NA	NA	NA
KGIC033B 2015	MT073198	MT036564	MT090148	Asterochloris pseudoirregularis	Cladonia sp.	King George Island	NA	−62.131490	−58.459550	0
KGS007A	KX051239	KX051235	MT135227	Asterochloris sejongensis	Cladonia pyxidata	King George Island, Antarctica	terricolous	-62.2167833	-58.76133333333333	0
KGS064B	KX051240	KX051236	MT135228	Asterochloris sejongensis	Cladonia pyxidata	King George Island, Antarctica	terricolous	-62.2167833	-58.76133333333333	0
KP257351/ c19	KP257351	KP257384		Asterochloris mediterranea	Cladonia convoluta/foliacea	Spain, Villena, Alicante	saxicolous	38.6572222	-0.9369444	518
KP318678	KP318678	FN556033		Clade A6	Lepraria crassissima	Czech Republic	saxicolous	NA	NA	NA
KP318679/ Peksa 866	KP318679	FN556044		Asterochloris lobophora	Lepraria borealis	Czech Republic, Šumava Mts	muscicolous	49.107	13.584	850
L60	EU008715	EU008690		Clade URa14	Lepraria sp.	China, Yunnan	corticolous	24.998611	101.432819	2058
Nelsen 2181b	DQ229896	DQ229884		Clade S1	Stereocaulon sp.	Costa Rica, San José	NA	9.864167	-84.026686	1542
Peksa 183	AM906031	AM906002	KP318696	Asterochloris leprarii	Lepraria neglecta	Czech Republic, Šumava Mts	saxicolous	49.034	13.475	1058
Peksa 860	FN556048	FN556035		Clade A9	Lepraria alpina	Spain, Somiedo Mts, St. Maria del Puerto	saxicolous	43.02851	-6.235686	1450
Peksa 186	AM906017	AM905992	KP318700	Asterochloris echinata	Lepraria rigidula	Czech Republic, Lužické hory Mts, Klíč Mt.	muscicolous	50.787	14.571	398
Peksa 236	AM906023	AM905997	KP318697	Asterochloris gaertneri	Lepraria rigidula	Czech Republic, Králický Sněžník Mts	corticolous	50.193	16.856	1146
Peksa 495	KP318681	KP318676		Clade A4	Diploschistes muscorum	Czech Republic, Lužické hory Mts.	saxicolous	50.805485	14.858081	383
Peksa 498	AM906026	AM905998		Asterochloris glomerata	Diploschistes muscorum	Czech Republic, Lužické hory Mts, Studenec Mt.	saxicolous	50.831	14.45	401
Peksa 551	FM955671	FM955667		Asterochloris echinata	Lepraria caesioalba	Czech Republic, Lužické hory Mts, Klíč Mt.	muscicolous	50.788743	14.569291	398
Peksa 787	FM955675	FM945380		Clade 8	Cladonia rei	Slovakia, Volovské vrchy	terricolous	8.856804	20.924723	500
Peksa 796	FM955674	FM945358		Clade 8	Cladonia fimbriata	Slovakia, Nízké Tatry Mts,	terricolous	48.808947	19.134917	780
Peksa 873	FN556051	FN556042		Clade A11	Lepraria caesioalba	USA, California, Mt. Tamalpais State Park, Pantoll	saxicolous	37.906541	-122.60934	460
Peksa 900	FM955673	FM955669		Asterochloris gaertneri	Lepraria rigidula	Czech Republic, Šumava Mts, Svojše	corticolous	49.0370561	13.5399211	850
Peksa 921	FM955677	FM945378		Clade 12	Cladonia rei	Czech Republic, East Bohemia, Chvaletice	terricolous	50.0363411	15.44485	250
Řídká I6	MH382117	HE803029		Clade I1	Cladonia rangiferina	India	terricolous	30.220544	80.22085	2553
Řídká IH1	UNPUBLISHED	HE803048		Clade 9	Cladonia praetermissa	India	terricolous	22.7135833	81.74619444444444	1665
Řídká IH14	UNPUBLISHED	HE803039		Clade 9	Cladonia coniocraea	Nepal:Mahakali zone	terricolous	29.3023611	80.59241666666667	1800
Řídká IH20	KP318682	HE803038		Clade 9	Cladonia scabriuscula	India	saxicolous	17.921556	73.673167	1410
Řídká IH23	MH382118	HE803036		Clade I2	Cladonia furcata	India	terricolous	11.395944	76.726833	2607
Řídká IH31	MH382119	HE803033		Clade I1	Cladonia corymbescens	India	terricolous	29.970917	80.65547	2743
SAG 26.81	AM906042	AM900490	KP318702	Asterochloris phycobiontica	Anzina carneonivea	Italy, Trento, Madonna di Campiglio	NA	46.231886	10.829	1777
Talbot KIS 1873	DQ229897	DQ229886		Clade S3	Stereocaulon saxatile	USA, Alaska, Kiska Island,	NA	51.978383	177.53985	138
Talbot 281	DQ229888	DQ229885		Asterochloris aff. irregularis	Stereocaulon vesuvianum	USA, Alaska, Sviechnikof	saxicolous	52.05913	-173.398884	112
UTEX 1714	AM906019	AM905993	AJ969629	Asterochloris excentrica	Stereocaulon dactylophyllum	USA, Stowe, Vermont	saxicolous	44.475278	-72.702221	265
UTEX 895	AM906024	AF345382		Asterochloris glomerata	Stereocaulon evolutoides	USA, Princeton, Wachusett Mt.	saxicolous	42.488979	-71.887019	387
UTEX 902	AM906041	AM906012	AJ969630	Asterochloris magna	Pilophorus aciculare	USA, Olympic National Park, Washington	NA	47.971407	-123.490524	1405
UTEX 911	AM906018	AF345440		Asterochloris erici	Cladonia cristatella	USA, Whitinsville, Massachusetts	NA	42.105512	-71.666335	98
Vančurová A10	MH382121	MH415217		Asterochloris italiana	Stereocaulon alpinum	Argentina, Tierra del Fuego	terricolous	-54.835598	-68.484391	14
Vančurová A11	MH382122	MH415218		Clade A9	Stereocaulon cf. vesuvianum	Argentina, Tierra del Fuego	muscicolous	-54.783333	-68.383333	750
Vančurová A337	MH382127	MH415238		Asterochloris woessiae	Stereocaulon azoreum	Portugal, Madeira	saxicolous	32.75315	-17.0263	671
Vančurová A504	MH415056	MH415296		Clade A14	Stereocaulon cf. obesum	Panama	saxicolous	8.8176944	-82.5943611	1773
Vančurová DS3.1	MH382136	MH415307		Asterochloris lobophora	Stereocaulon sp.	Russia, Eastern Siberia	terricolous	57.98387	127.06477	586
Vančurová O10	MH382144	MH415374		Clade 12	Stereocaulon sp.	Mexico, Oaxaca	NA	20.624466	-100.355976	1945
Vančurová A1	MH382120	MH415216		Clade StA6	Stereocaulon cf. alpinum	Argentina, Santa Cruz	terricolous	-49.266667	-72.983333	990
Vancurova A105	-	KR952331		Vulcanochloris symbiotica	Stereocaulon vesuvianum	Spain: Canary Islands, La Palma	saxicolous	28.598806	-17.893389	405
Vančurová A13	MH382123	MH415219		Clade StA7	Stereocaulon cf. vesuvianum	Argentina, Tierra del Fuego	terricolous	-54.835598	-68.484391	14
Vančurová A319	MH382126	MH415229		Clade StA8	Stereocaulon myriocarpum	Costa Rica, PN Chirripó	NA	9.4503278	-83.5122194	3042
Vančurová A378	MH382129	MH415257		Clade StA2	Stereocaulon alpinum	iceland, Southern Peninsula	saxicolous	63.81887	-22.68194	20
Vančurová A392	MH382131	MH415269		Clade StA2	Stereocaulon saxatile	iceland,	saxicolous	63.91209	-17.71864	43
Vančurová A496	MH382132	MH415287		Clade StA8	Stereocaulon myriocarpum	Venezuela, Pico Bolívar	saxicolous	8.475131	-71.057945	3209
Vancurova A72	-	KR952321		Vulcanochloris symbiotica	Stereocaulon vesuvianum	Spain: Canary Islands, La Palma	saxicolous	28.4855	-17.849917	236
Vancurova A73	-	KR952322		Vulcanochloris symbiotica	Stereocaulon vesuvianum	Spain: Canary Islands, La Palma	saxicolous	28.4855	-17.849917	236
Vancurova A74	-	KR952323		Vulcanochloris symbiotica	Stereocaulon vesuvianum	Spain: Canary Islands, La Palma	saxicolous	28.487167	-17.849139	236
Vancurova A75	-	KR952324		Vulcanochloris symbiotica	Stereocaulon vesuvianum	Spain: Canary Islands, La Palma	saxicolous	28.486511	-17.849786	236
Vancurova A77	-	KR952325		Vulcanochloris symbiotica	Stereocaulon vesuvianum	Spain: Canary Islands, La Palma	saxicolous	28.477694	-17.850361	236
Vancurova A78	-	KR952326		Vulcanochloris symbiotica	Stereocaulon vesuvianum	Spain: Canary Islands, La Palma	saxicolous	28.474722	-17.851028	236
Vancurova A80	-	KR952327		Vulcanochloris symbiotica	Stereocaulon vesuvianum	Spain: Canary Islands, La Palma	saxicolous	28.464139	-17.845333	236
Vancurova A97	-	KR952328		Vulcanochloris symbiotica	Stereocaulon vesuvianum	Spain: Canary Islands, La Palma	saxicolous	28.653167	-17.851194	875
Vancurova A98	-	KR952329		Vulcanochloris canariensis	Stereocaulon vesuvianum	Spain: Canary Islands, La Palma	saxicolous	28.6528	-17.8512	875
Vančurová L1074	MH382137	MH415329		Clade StA4	Stereocaulon sp.	Alaska	terricolous	60.574207	-149.572659	406
Vancurova L1616	-	KR952317		Vulcanochloris symbiotica	Stereocaulon vesuvianum	Spain: Canary Islands, La Palma	saxicolous	28.481944	-17.849444	236
Vancurova L1617	-	KR952318		Vulcanochloris symbiotica	Stereocaulon vesuvianum	Spain: Canary Islands, La Palma	saxicolous	28.604722	-17.895389	405
Vancurova L1618	-	KR952319		Vulcanochloris symbiotica	Stereocaulon vesuvianum	Spain: Canary Islands, La Palma	saxicolous	28.481389	-17.845556	236
Vancurova L1620	-	KR952320		Vulcanochloris canariensis	Stereocaulon vesuvianum	Spain: Canary Islands, La Palma	saxicolous	28.473056	-17.847222	236
Vančurová L958	MH382141	MH415366		Clade StA5	Stereocaulon alpinum	Austria, Tyrol	terricolous	47.047778	12.690278	2941
Vančurová O76	MH382149	MH415428		Clade StA1	Stereocaulon vesuvianum	Denmark, Faroe Islands	NA	62.3270111	-6.4870639	143
VancurovaA104	-	KR952330		Vulcanochloris guanchorum	Stereocaulon vesuvianum	Spain: Canary Islands, La Palma	saxicolous	28.604722	-17.895389	405
Vančurová A359	MH382128	MH415252		Asterochloris woessiae	Stereocaulon azoreum	Portugal, Madeira	saxicolous	32.758983	-16.93945	1250
Vančurová O98	MH382150	MH415438		Clade StA3	Cladonia macrophylla	Denmark, Faroe Islands	NA	62.0196944	-6.8256111	0
Řídká T8	-	MH415212		Clade StA3	Stereocaulon vesuvianum	Tanzania, Mt. Kilimanjaro	saxicolous	-3.06127	37.31287	4430
Řídká T20	-	MH415210		Asterochloris sp.	Stereocaulon vesuvianum	Tanzania, Mt. Kilimanjaro	saxicolous	-3.06127	37.31287	4430
Peksa 166	AM906037	AM906008		Asterochloris lobophora	Lepraria caesioalba	Czech Republic, Šumava Mts., Kašperk Mt.	saxicolous	49.16598	13.564892	746
Vančurová O50	MH382146	MH415414		Clade StA5	Stereocaulon cf. alpinum	Canada	terricolous	49.693841	-125.364318	1168
Vančurová O70	MH382147	MH415422		Asterochloris aff. italiana	Stereocaulon azoreum	Portugal, Madeira	terricolous	32.816195	-17.190006	900
Vančurová A14	MH382124	MH415220		Asterochloris sp.	Stereocaulon sp.	Argentina, Neuquén, PN	terricolous	-39.566667	-71.433333	1062
Vančurová KO25.2	-	MH415313		Asterochloris mediterranea	Stereocaulon vesuvianum	Spain, Canary Islands	terricolous	28.761944	-17.876111	1850
Vančurová A3	MH382125	MH415226		Clade A9	Stereocaulon vesuvianum	Argentina, Santa Cruz	saxicolous	-49.266667	-72.983333	990
Peksa 1011	MH382116	MH415203		Clade A9	Stereocaulon nanodes	Slovakia, Nízké Tatry Mts, Špania dolina	saxicolous	48.808947	19.134917	860
Vančurová A386	MH415264	MH382130		Clade A9	Stereocaulon cf. alpinum	Iceland	terricolous	64.12108	-19.78241	238
Vančurová A498	MH415288	MH382133		Clade StA8	Stereocaulon myriocarpum	Venezuela, Pico Bolívar	NA	8.525631	-71.026659	3876
Vančurová A502	MH415294	MH382134		Clade StA8	Stereocaulon myriocarpum	Venezuela, Pico Bolívar	saxicolous	8.54806	-71.024835	4308
Hammer 7000	-	AF345437		Clade StA7	Cladia aggregata	Australia	NA	NA	NA	NA
Peksa 870	FN556043	FN556052		Clade A11	Lepraria sp.	USA, California, Sierra Nevada Mts	saxicolous	36.545429	-118.766128	13
Vančurová L988	MH415367	MH382142		Asterochloris aff. irregularis	Stereocaulon paschale	USA, Alaska	terricolous	63.295365	-149.189554	732
Vančurová L992	MH415370	MH382143		Asterochloris irregularis	Stereocaulon vesuvianum	Austria, Styria	saxicolous	47.084722	14.547222	1883
Nomore 375	-	AF345442		Asterochloris erici	Stereocaulon dactylophyllum	Canada, Nova Scotia, Harmony Mills	saxicolous	44.415606	-65.088607	116
Vančurová O75	MH382148	MH415427		Asterochloris glomerata	Stereocaulon pileatum	Portugal, Madeira	saxicolous	32.816195	-17.190006	900
UTEX 894	-	FJ626732	AJ969633	Asterochloris glomerata	Stereocaulon evolutoides	USA, Princeton, Wachusett Mt.	saxicolous	42.488979	-71.887019	387
UTEX 1712	AM906025	AF345406	AJ969634	Asterochloris glomerata	Cladonia squamosa	USA, Massachusetts	NA	NA	NA	NA
Peksa 999	AM906028	AM905999	KP318701	Asterochloris glomerata	Stereocaulon pileatum	Czech Republic, České Švýcarsko NP	sandstone	50.883931	14.281506	356
UTEX 910	-	AF345439	AJ969631	Asterochloris erici	Cladonia cristatella	USA: Whitinsville, MA	NA	42.105512	-71.666335	98
UTEX 2236	AM906027	AF345411		Asterochloris irregularis	Stereocaulon sp.	Iceland: Langa River	NA	NA	NA	NA
-	-	AF345424	-	Asterochloris italiana	Cladonia scabriuscula	Australia	NA	NA	NA	NA
-	-	AY842277	-	?	Cladonia crinita	Brazil: Monasterio do Caraca, Minas Gerais	terricolous	-20.083	-43.48334	992
-	-	AY842278	-	?	Cladonia fissidens	Brazil: Monasterio do Caraca, Minas Gerais	terricolous	-20.083	-43.48334	992
-	-	JN990658	-	?	Cladonia didyma	NA	terricolous	NA	NA	NA
-	-	JN990660	-	?	Cladonia didyma	NA	terricolous	NA	NA	NA
-	-	KJ690277	-	?	Cladonia pleurota	Canada	saxicolous	54.00	-101.00	257
-	-	KJ690281	-	?	Stereocaulon paschale	Canada	terricolous	54.00	-101.00	257
-	-	KJ690285	-	?	Cladonia pleurota	Canada	saxicolous	54.00	-101.00	257
-	-	KJ690289	-	?	Stereocaulon paschale	Canada	terricolous	54.00	-101.00	257
-	-	KP314498	-	Asterochloris magna	Cladonia pocillum	Svalbard	saxicolous	78.92	11.93	24
-	-	KP314501	-	Asterochloris magna	Cladonia pocillum	Svalbard	saxicolous	78.92	11.93	24
-	-	KP314523	-	?	Cladonia pocillum	Svalbard	saxicolous	78.92	11.93	24
-	-	KP314558	-	?	Cladonia pocillum	Svalbard	saxicolous	78.92	11.93	24
-	-	KP314581	-	?	Cladonia pocillum	Svalbard	saxicolous	78.92	11.93	24
-	-	KP314582	-	?	Cladonia pocillum	Svalbard	saxicolous	78.92	11.93	24
-	-	KP314595	-	Asterochloris magna	Cladonia pocillum	Svalbard	saxicolous	78.92	11.93	24
-	-	KP314604	-	?	Cladonia pocillum	Svalbard	saxicolous	78.92	11.93	24
-	-	KP314635	-	?	Cladonia pocillum	Svalbard	saxicolous	78.92	11.93	24
-	-	KP314648	-	Asterochloris magna	Cladonia pocillum	Svalbard	saxicolous	78.92	11.93	24
-	-	KP314665	-	Asterochloris magna	Cladonia pocillum	Svalbard	saxicolous	78.92	11.93	24
-	-	KJ690281	-	?	Stereocaulon paschale	Canada	terricolous	54.00	-101.00	257
-	-	KJ690289	-	?	Stereocaulon paschale	Canada	terricolous	54.00	-101.00	257
-	-	FN556040	-	Clade A11	Lepraria caesioalba	USA, California	NA	NA	NA	900
-	-	FN556041	-	Clade A11	Lepraria caesioalba	USA, California	NA	NA	NA	1000
-	-	FN556039	-	Clade A11	Lepraria borealis	USA, California	NA	NA	NA	2000
-	-	KF907669	-	Clade A19	Psora decipiens	Germany: Ruine Homburg	NA	50.0167	9.8	295
-	-	FN556030	-	Clade A4	Lepraria caesioalba	Czech Republic	NA	NA	NA	250
-	-	FN556031	-	Clade A4	Lepraria rigidula	Czech Republic, Brdy Mts, Hřebenec Nature Reserve	corticolous	49.5812481	13.7651575	730
-	-	FN556032	-	Clade A4	Lepraria rigidula	Czech Republic	NA	NA	NA	790
-	-	EU008710	-	Clade A6	Lepraria nigrocincta	Costa Rica	NA	NA	NA	NA
-	-	KP318678	-	Clade A6	Lepraria crassissima	Czech Republic	saxicolous	NA	NA	NA
-	-	FN556036	-	Clade A9	Lepraria caesioalba	Czech Republic	NA	NA	NA	450
-	-	FJ406576	-	Clade A9	Lepraria borealis	Antarctica: Alexander Island, Coal Nunatak	terricolous	-72.05	-68.51666666666667	467
-	-	FJ406577	-	Clade A9	Ochrolechia frigida	Antarctica: Alexander Island, Coal Nunatak	terricolous	-72.05	-68.51666666666667	467
-	-	KX120198	-	Clade A9	Porpidia navarina	Chile: Tierra del Fuego, Isla Navarino, Cerro Bandera	saxicolous	-54.97	-67.64	620
-	-	MH415274	-	Clade A9	Stereocaulon vesuvianum	Italy, Sicily	saxicolous	37.84069	15.08844	659
-	-	MH415223	-	Clade A9	Stereocaulon cf. alpinum	Argentina, Santa Cruz	terricolous	-49.266667	-72.983333	990
-	-	MH415290	-	Clade A9	Stereocaulon vesuvianum	Argentina, Santa Cruz, PN los Glaciares	terricolous	-49.316667	-72.983333	1098
-	-	MH415303	-	Clade A9	Stereocaulon sp.	Argentina, Santa Cruz, PN los Glaciares	terricolous	-49.316667	-72.983333	1098
-	-	FJ426298	-	Clade A9	Ochrolechia frigida	NA	NA	NA	NA	NA
-	-	FJ426299	-	Clade A9	Lepraria borealis	NA	NA	NA	NA	NA
-	-	KT989922	-	Clade A9	Cladonia coccifera	Czech Republic: Krkonose Mts.	NA	NA	NA	NA
-	-	MH415378	-	Asterochloris aff. irregularis	Stereocaulon arcticum	Denmark, Faroe Islands		62.3173611	-7.1034444	0
-	-	KP314531	-	Asterochloris aff. irregularis	Cladonia borealis	Svalbard	saxicolous	78.92	11.93	24
-	-	KP314537	-	Asterochloris aff. irregularis	Lecidea sp.	Svalbard	saxicolous	78.92	11.93	24
-	-	KP314538	-	Asterochloris aff. irregularis	Cladonia borealis	Svalbard	saxicolous	78.92	11.93	24
-	-	KP314541	-	Asterochloris aff. irregularis	Cladonia borealis	Svalbard	saxicolous	78.92	11.93	24
-	-	KP314544	-	Asterochloris aff. irregularis	Cladonia borealis	Svalbard	saxicolous	78.92	11.93	24
-	-	KP314578	-	Asterochloris aff. irregularis	Cladonia borealis	Svalbard	saxicolous	78.92	11.93	24
-	-	KP314584	-	Asterochloris aff. irregularis	Cladonia borealis	Svalbard	saxicolous	78.92	11.93	24
-	-	KP314585	-	Asterochloris aff. irregularis	Cladonia mitis	Svalbard	saxicolous	78.92	11.93	24
-	-	KP314590	-	Asterochloris aff. irregularis	Cladonia borealis	Svalbard	saxicolous	78.92	11.93	24
-	-	KP314593	-	Asterochloris aff. irregularis	Cladonia mitis	Svalbard	saxicolous	78.92	11.93	24
-	-	KP314600	-	Asterochloris aff. irregularis	Cladonia borealis	Svalbard	saxicolous	78.92	11.93	24
-	-	KP314649	-	Asterochloris aff. irregularis	Cladonia mitis	Svalbard	saxicolous	78.92	11.93	24
-	-	KP314657	-	Asterochloris aff. irregularis	Cladonia mitis	Svalbard	saxicolous	78.92	11.93	24
-	-	KP314659	-	Asterochloris aff. irregularis	Cladonia borealis	Svalbard	saxicolous	78.92	11.93	24
-	-	KP314664	-	Asterochloris aff. irregularis	Cladonia borealis	Svalbard	saxicolous	78.92	11.93	24
-	-	KP314685	-	Asterochloris aff. irregularis	Lecidea sp.	Svalbard	saxicolous	78.92	11.93	24
-	-	KP314686	-	Asterochloris aff. irregularis	Lecidea sp.	Svalbard	saxicolous	78.92	11.93	24
-	-	KP314536	-	Asterochloris aff. irregularis	Stereocaulon vesuvianum	Svalbard	saxicolous	78.92	11.93	24
-	-	KP314583	-	Asterochloris aff. irregularis	Stereocaulon botryosum	Svalbard	saxicolous	78.92	11.93	24
-	-	KP314586	-	Asterochloris aff. irregularis	Stereocaulon botryosum	Svalbard	saxicolous	78.92	11.93	24
-	-	AY622825	-	Asterochloris aff. irregularis	Cladonia gracilis	Canada	saxicolous	53.94052847486395	-101.18853759765625	271
-	-	AY622834	-	Asterochloris aff. irregularis	Cladonia rangiferina	Canada	saxicolous	53.94052847486395	-101.18853759765625	271
-	-	MH415263	-	Asterochloris aff. irregularis	Stereocaulon arcticum	iceland,	saxicolous	64.21289	-19.2558	410
-	-	FM945376	-	Asterochloris aff. irregularis	Cladonia rangiferina	Czech Republic: Harmanec	saxicolous	48.8166667	19.5	500
-	-	MH415323.	-	Asterochloris aff. irregularis	Stereocaulon tomentosum/ sasakii	Alaska	terricolous	60.270019	-149.4295	650
-	-	MH415409	-	Asterochloris aff. irregularis	Stereocaulon alpinum	Canada	terricolous	50.494722	-116.053889	972
-	-	MH415407	-	Asterochloris aff. irregularis	Stereocaulon pileatum	Austria	saxicolous	47.441389	14.411389	1891
-	-	MH415408	-	Asterochloris aff. irregularis	Stereocaulon cf. alpinum	Austria	saxicolous	47.441389	14.411389	1891
-	-	AF345413	-	Asterochloris aff. irregularis	Cladonia bellidiflora	Norway	NA	NA	NA	NA
-	-	KT989936	-	Asterochloris aff. irregularis	Cladonia coccifera	Norway: Rondane NP	NA	NA	NA	NA
-	-	KT989937	-	Asterochloris aff. irregularis	Cladonia pleurota	Montenegro: Prokletije	NA	NA	NA	NA
-	-	KT989938	-	Asterochloris aff. irregularis	Cladonia pleurota	Austria: Hochrindl	NA	NA	NA	NA
-	-	KT989939	-	Asterochloris aff. irregularis	Cladonia pleurota	Norway: Rondane	NA	NA	NA	NA
-	-	KT989940	-	Asterochloris aff. irregularis	Cladonia deformis	Spain	NA	NA	NA	NA
-	-	MH415391	-	Asterochloris aff. italiana	Stereocaulon dactylophyllum	Sweden, Värnamo	saxicolous	57.2495833	13.9591111	200
-	-	FM945349	-	Asterochloris aff. italiana	Cladonia humilis	Czech Republic, East Bohemia, Chvaletice	terricolous	50.0363411	15.44485	250
-	-	MH415255	-	Asterochloris aff. italiana	Stereocaulon sp.	Portugal, Madeira	saxicolous	32.7294667	-16.8853	1175
-	-	KT989908	-	Asterochloris aff. italiana	Cladonia coccifera	Czech Republic: Novohradske hory Mts.	NA	NA	NA	NA
-	-	KT989909	-	Asterochloris aff. italiana	Cladonia coccifera	Czech Republic: Kasperske hory Mts.	NA	NA	NA	NA
-	-	KT989910	-	Asterochloris aff. italiana	Cladonia coccifera	Czech Republic: Ceskosaske Svycarsko	NA	NA	NA	NA
-	-	KT989911	-	Asterochloris aff. italiana	Cladonia coccifera	Austria	NA	NA	NA	NA
-	-	KT989912	-	Asterochloris aff. italiana	Cladonia diversa	Germany: Oberlausitzer Heide	NA	NA	NA	NA
-	-	KT989913	-	Asterochloris aff. italiana	Cladonia diversa	Spain: Asturias	NA	NA	NA	NA
-	-	KT989914	-	Asterochloris aff. italiana	Cladonia coccifera	Czech Republic: Jizerske hory Mts.	NA	NA	NA	NA
-	-	FN556027	-	Asterochloris echinata	Lepraria caesioalba	Slovakia	saxicolous	NA	NA	1690
-	-	FN556026	-	Asterochloris echinata	Lepraria alpina	Spain	saxicolous	NA	NA	1700
-	-	FN556028	-	Asterochloris echinata	Lepraria caesioalba	Spain	saxicolous	NA	NA	1700
-	-	FN556029	-	Asterochloris echinata	Lepraria granulata	Bulgaria	saxicolous	NA	NA	2410
-	-	KP318671	-	Asterochloris echinata	Cladonia diversa	Portugal: Beira Alta	NA	NA	NA	NA
-	-	KP314492	-	Asterochloris erici	Cladonia pocillum	Svalbard	saxicolous	78.92	11.93	24
-	-	KP314503	-	Asterochloris erici	Cladonia pocillum	Svalbard	saxicolous	78.92	11.93	24
-	-	KP314598	-	Asterochloris erici	Cladonia pocillum	Svalbard	saxicolous	78.92	11.93	24
-	-	KP314633	-	Asterochloris erici	Cladonia pocillum	Svalbard	saxicolous	78.92	11.93	24
-	-	AF345441	-	Asterochloris erici	Cladonia cristatella	USA: Worcester, MA	corticolous	NA	NA	NA
-	-	AF345433	-	Asterochloris excentrica	Stereocaulon dactylophyllum	USA: Mt. Mansfield, Stowe, VT	NA	NA	NA	NA
-	-	FN556034	-	Asterochloris friedlii	Lepraria rigidula	Czech Republic	corticolous	NA	NA	850
-	-	AM905994	-	Asterochloris friedlii	Lepraria cf. caesioalba	Slovakia:Slovenske Rudohorie Mts., Lubietovsky		48.691	19.764	998
-	-	EU008659	-	Asterochloris friedlii	Lepraria atrotomentosa	China	NA	24.998611	101.432819	2058
-	-	AM905996	-	Asterochloris friedlii	Lepraria caesioalba	Romania:Paring Mts., Gliceascu lake	NA	NA	NA	NA
-	-	EU008660	-	Asterochloris friedlii	Lepraria caesiella	USA	NA	NA	NA	NA
-	-	EU008661	-	Asterochloris friedlii	Lepraria caesiella	USA	NA	NA	NA	NA
-	-	EU008662	-	Asterochloris friedlii	Lepraria caesiella	USA	NA	NA	NA	NA
-	-	EU008664	-	Asterochloris friedlii	Lepraria caesioalba	USA	NA	NA	NA	NA
-	-	EU008665	-	Asterochloris friedlii	Lepraria caesioalba	USA	NA	NA	NA	NA
-	-	EU008666	-	Asterochloris friedlii	Lepraria caesioalba	USA	NA	NA	NA	NA
-	-	EU008668	-	Asterochloris friedlii	Lepraria incana	USA	NA	NA	NA	NA
-	-	EU008669	-	Asterochloris friedlii	Lepraria incana	USA	NA	NA	NA	NA
-	-	EU008670	-	Asterochloris friedlii	Lepraria finkii	USA	NA	NA	NA	NA
-	-	EU008671	-	Asterochloris friedlii	Lepraria finkii	USA	NA	NA	NA	NA
-	-	EU008672	-	Asterochloris friedlii	Lepraria finkii	USA	NA	NA	NA	NA
-	-	EU008673	-	Asterochloris friedlii	Lepraria finkii	USA	NA	NA	NA	NA
-	-	EU008674	-	Asterochloris friedlii	Lepraria finkii	USA	NA	NA	NA	NA
-	-	EU008675	-	Asterochloris friedlii	Lepraria finkii	USA	NA	NA	NA	NA
-	-	EU008676	-	Asterochloris friedlii	Lepraria finkii	USA	NA	NA	NA	NA
-	-	EU008678	-	Asterochloris friedlii	Lepraria finkii	USA	NA	NA	NA	NA
-	-	EU008679	-	Asterochloris friedlii	Lepraria finkii	USA	NA	NA	NA	NA
-	-	EU008680	-	Asterochloris friedlii	Lepraria finkii	USA	NA	NA	NA	NA
-	-	EU008682	-	Asterochloris friedlii	Lepraria nivalis	Canada	NA	NA	NA	NA
-	-	KP318670	-	Asterochloris friedlii	Lepraria elobata	Slovakia: Nizke Tatry Mts.	NA	NA	NA	NA
-	-	DQ229879	-	Asterochloris friedlii	Cladonia caespitecia	Pennsylvania, USA	NA	NA	NA	NA
-	-	KM250371	-	Asterochloris friedlii	Parmelinopsis minarum	South Korea	saxicolous	NA	NA	NA
-	-	MH258948	-	Asterochloris friedlii	Myelochroa aurulenta	Korea	NA	NA	NA	NA
-	-	FN556037	-	Asterochloris gaertneri	Lepraria incana	Czech Republic	corticolous	NA	NA	400
-	-	FN556038	-	Asterochloris gaertneri	Lepraria membranacea	Czech Republic	corticolous	NA	NA	530
-	-	FM955668	-	Asterochloris gaertneri	Lepraria rigidula	Czech Republic: Sumava Mts, Safaruv vrsek Mt.	saxicolous	NA	NA	NA
-	-	KP318664	-	Asterochloris gaertneri	Lepraria rigidula	Czech Republic: Hanusovicka vrchovina	NA	NA	NA	NA
-	-	AY712688	-	Asterochloris glomerata	Cladonia subsetacea	USA: Highlands County, FL	NA	27.06487465117238	-80.95763814335939	7
-	-	AY712689	-	Asterochloris glomerata	Cladonia dimorphoclada	USA: Polk County, FL	NA	27.617719070802455	-81.12380635625001	20
-	-	KP314550	-	Asterochloris glomerata	Stereocaulon vesuvianum	Svalbard	saxicolous	78.92	11.93	24
-	-	MH415433	-	Asterochloris glomerata	Stereocaulon rivulorum	Denmark, Faroe Islands	NA	62.2368	-6.6174	80
-	-	AF345392	-	Asterochloris glomerata	Cladonia atlantica	USA: Massachusetts	NA	42.105512	-71.666335	98
-	-	AF345396	-	Asterochloris glomerata	Cladonia floridana	USA: Massachusetts	NA	42.105512	-71.666335	98
-	-	AF345375	-	Asterochloris glomerata	Cladonia strepsilis	Canada: Nove Scotia	NA	44.415606	-65.088607	116
-	-	AF345376.	-	Asterochloris glomerata	Cladonia grayi	Canada: Nova Scotia	NA	44.415606	-65.088607	116
-	-	AF345377	-	Asterochloris glomerata	Cladonia botrytes	Canada: Nova Scotia	NA	44.415606	-65.088607	116
-	-	AF345379	-	Asterochloris glomerata	Cladonia grayi	Canada: Nova Scotia	NA	44.415606	-65.088607	116
-	-	AF345380	-	Asterochloris glomerata	Cladonia grayi	Canada: Nova Scotia	NA	44.415606	-65.088607	116
-	-	AF345381	-	Asterochloris glomerata	Cladonia squamosa	Canada: Nova Scotia	NA	44.415606	-65.088607	116
-	-	AF345385	-	Asterochloris glomerata	Cladonia grayi	Canada: Nova Scotia	NA	44.415606	-65.088607	116
-	-	AF345388	-	Asterochloris glomerata	Cladonia strepsilis	Canada: Nova Scotia	NA	44.415606	-65.088607	116
-	-	AF345397	-	Asterochloris glomerata	Cladonia grayi	Canada: Nova Scotia	NA	44.415606	-65.088607	116
-	-	AF345401	-	Asterochloris glomerata	Cladonia strepsilis	Canada: Nova Scotia	NA	44.415606	-65.088607	116
-	-	AF345402	-	Asterochloris glomerata	Cladonia strepsilis	Canada: Nova Scotia	NA	44.415606	-65.088607	116
-	-	MH415393	-	Asterochloris glomerata	Stereocaulon cf. grande	Finland	saxicolous	61.191902	25.227629	168
-	-	FM945351	-	Asterochloris glomerata	Cladonia coccifera	Czech Republic, East Bohemia, Chvaletice	terricolous	50.0363411	15.44485	250
-	-	FM945352	-	Asterochloris glomerata	Cladonia coccifera	Czech Republic, East Bohemia, Chvaletice	terricolous	50.0363411	15.44485	250
-	-	FM945357	-	Asterochloris glomerata	Cladonia deformis	Czech Republic, East Bohemia, Chvaletice	terricolous	50.0363411	15.44485	250
-	-	FM945363	-	Asterochloris glomerata	Cladonia macilenta	Czech Republic, East Bohemia, Chvaletice	terricolous	50.0363411	15.44485	250
-	-	FM945364	-	Asterochloris glomerata	Cladonia macilenta	Czech Republic, East Bohemia, Chvaletice	terricolous	50.0363411	15.44485	250
-	-	AY622822	-	Asterochloris glomerata	Cladonia gracilis	Canada	saxicolous	53.94052847486395	-101.18853759765625	271
-	-	AY622824	-	Asterochloris glomerata	Cladonia gracilis	Canada	saxicolous	53.94052847486395	-101.18853759765625	271
-	-	AY622826	-	Asterochloris glomerata	Cladonia gracilis	Canada	saxicolous	53.94052847486395	-101.18853759765625	271
-	-	AY622831	-	Asterochloris glomerata	Cladonia gracilis	Canada	terricolous	49.99869245199551	-95.62533569335938	302
-	-	AY622832	-	Asterochloris glomerata	Cladonia gracilis	Canada	terricolous	49.99869245199551	-95.62533569335938	302
-	-	AY622833	-	Asterochloris glomerata	Cladonia gracilis	Canada	terricolous	49.99869245199551	-95.62533569335938	302
-	-	AY622836	-	Asterochloris glomerata	Cladonia rangiferina	Canada	terricolous	49.99869245199551	-95.62533569335938	302
-	-	AY622837	-	Asterochloris glomerata	Cladonia rangiferina	Canada	terricolous	49.99869245199551	-95.62533569335938	302
-	-	AY622838	-	Asterochloris glomerata	Cladonia rangiferina	Canada	terricolous	49.99869245199551	-95.62533569335938	302
-	-	AY622839	-	Asterochloris glomerata	Cladonia rangiferina	Canada	terricolous	49.99869245199551	-95.62533569335938	302
-	-	AY622840	-	Asterochloris glomerata	Cladonia rangiferina	Canada	terricolous	49.99869245199551	-95.62533569335938	302
-	-	MH415396	-	Asterochloris glomerata	Stereocaulon symphycheilum	Czech Republic	terricolous	50.881398	14.293097	342
-	-	AF345404	-	Asterochloris glomerata	Stereocaulon pileatum	USA, Princeton, Wachusett Mt.	saxicolous	42.488979	-71.887019	387
-	-	AF345405	-	Asterochloris glomerata	Stereocaulon pileatum	USA, Princeton, Wachusett Mt.	saxicolous	42.488979	-71.887019	387
-	-	AF345382	-	Asterochloris glomerata	Stereocaulon evolutoides	USA, Princeton, Wachusett Mt.	saxicolous	42.488979	-71.887019	387
-	-	AF345404	-	Asterochloris glomerata	Stereocaulon pileatum	USA, Princeton, Wachusett Mt.	saxicolous	42.488979	-71.887019	387
-	-	AF345405	-	Asterochloris glomerata	Stereocaulon pileatum	USA, Princeton, Wachusett Mt.	saxicolous	42.488979	-71.887019	387
-	-	FJ626732	-	Asterochloris glomerata	Stereocaulon evolutoides	USA, Princeton, Wachusett Mt.	saxicolous	42.488979	-71.887019	387
-	-	FM945353	-	Asterochloris glomerata	Cladonia coccifera	Czech Republic: Harmanec	saxicolous	48.8166667	19.5	500
-	-	FM945370	-	Asterochloris glomerata	Cladonia pleurota	Czech Republic: Harmanec	saxicolous	48.8166667	19.5	500
-	-	MH415301	-	Asterochloris glomerata	Stereocaulon arcticum	iceland	terricolous	63.85567	-19.23119	560
-	-	FM945367	-	Asterochloris glomerata	Cladonia mitis	Czech Republic: L’ubietov	terricolous	48.75	19.366666666666667	570
-	-	FM945371	-	Asterochloris glomerata	Cladonia pleurota	Czech Republic: L’ubietov	terricolous	48.75	19.366666666666667	570
-	-	FM945368	-	Asterochloris glomerata	Cladonia mitis	czech republic: Spania dolina	terricolous	48.808947	19.13491	780
-	-	FM945372	-	Asterochloris glomerata	Cladonia cf. novochlorophaea	czech republic: Spania dolina	terricolous	48.808947	19.13491	780
-	-	FM945392	-	Asterochloris glomerata	Stereocaulon saxatile	Slovakia, Nízké Tatry Mts, Špania dolina	terricolous	48.808947	19.13491	780
-	-	FM945392	-	Asterochloris glomerata	Stereocaulon saxatile	Slovakia, Nízké Tatry Mts, Špania dolina	terricolous	48.808947	19.13491	780
-	-	MH415204	-	Asterochloris glomerata	Stereocaulon pileatum	Slovakia: Nizke Tatry Mts, Spania dolina	saxicolous	48.808947	19.134917	860
-	-	MH415302	-	Asterochloris glomerata	Stereocaulon cf. alpinum	Argentina, Santa Cruz	terricolous	-49.336382	-72.946899	950
-	-	HE803028	-	Asterochloris glomerata	Cladonia coniocraea	Nepal:Mahakali zone	corticolous	29.3019722	80.59205555555555	1716
-	-	AF345374	-	Asterochloris glomerata	Anzina carneonivea	Austria	NA	NA	NA	NA
-	-	AF345378	-	Asterochloris glomerata	Cladonia crispata	Canada: New Foundland	NA	NA	NA	NA
-	-	AF345383	-	Asterochloris glomerata	Cladonia strepsilis	Italy: Suecica	NA	NA	NA	NA
-	-	AF345384	-	Asterochloris glomerata	Cladina arbuscula	USA: North Carolina	NA	NA	NA	NA
-	-	AF345386	-	Asterochloris glomerata	Cladonia robbinsii	USA: North Carolina	NA	NA	NA	NA
-	-	AF345387	-	Asterochloris glomerata	Cladonia strepsilis	USA: North Carolina	NA	NA	NA	NA
-	-	AF345389	-	Asterochloris glomerata	Pycnothelia papillaria	USA	NA	NA	NA	NA
-	-	AF345390	-	Asterochloris glomerata	Cladina arbuscula	USA: North Carolina	NA	NA	NA	NA
-	-	AF345391	-	Asterochloris glomerata	Cladina stellaris	USA: North Carolina	NA	NA	NA	NA
-	-	AF345393	-	Asterochloris glomerata	Cladonia atlantica	USA: Alabama	NA	NA	NA	NA
-	-	AF345394.	-	Asterochloris glomerata	Cladonia cervicornis subsp. verticillata	USA: North Carolina	NA	NA	NA	NA
-	-	AF345395	-	Asterochloris glomerata	Cladonia caroliniana	USA: Alabama	NA	NA	NA	NA
-	-	AF345398	-	Asterochloris glomerata	Cladonia pleurota	USA: North Carolina	NA	NA	NA	NA
-	-	AF345399	-	Asterochloris glomerata	Cladonia strepsilis	Japan	NA	NA	NA	NA
-	-	AF345400	-	Asterochloris glomerata	Cladonia strepsilis	USA: North Carolina	NA	NA	NA	NA
-	-	DQ530178	-	Asterochloris glomerata	Cladonia cervicornis subsp. verticillata	Canada	NA	NA	NA	NA
-	-	DQ530181	-	Asterochloris glomerata	Cladonia pyxidata	Canada	NA	NA	NA	NA
-	-	DQ530182.	-	Asterochloris glomerata	Cladonia ochrochlora	Canada	NA	NA	NA	NA
-	-	DQ530183	-	Asterochloris glomerata	Cladonia ecmocyna	Canada	NA	NA	NA	NA
-	-	DQ530186	-	Asterochloris glomerata	Cladonia merochlorophaea	Canada	NA	NA	NA	NA
-	-	DQ530187	-	Asterochloris glomerata	Cladonia grayi	Canada	NA	NA	NA	NA
-	-	KP031547	-	Asterochloris glomerata	Cladonia rangiferina	NA	NA	NA	NA	NA
-	-	KT989941	-	Asterochloris glomerata	Cladonia pleurota	Austria: Stubalpe	NA	NA	NA	NA
-	-	KT989942	-	Asterochloris glomerata	Cladonia pleurota	Czech Republic: Brdy Mts.	NA	NA	NA	NA
-	-	KT989943	-	Asterochloris glomerata	Cladonia pleurota	Czech Republic: Brdy Mts.	NA	NA	NA	NA
-	-	KT989944	-	Asterochloris glomerata	Cladonia pleurota	Czech Republic: Radvanice	NA	NA	NA	NA
-	-	KT989945	-	Asterochloris glomerata	Cladonia pleurota	Austria: Gurktaler Alpen	NA	NA	NA	NA
-	-	KT989946	-	Asterochloris glomerata	Cladonia deformis	Finland: Suomossalmi	NA	NA	NA	NA
-	-	KT989947.	-	Asterochloris glomerata	Cladonia deformis	Finland: Suomenlinna	NA	NA	NA	NA
-	-	KT989948	-	Asterochloris glomerata	Cladonia deformis	Czech Republic: Sumava Mts	NA	NA	NA	NA
-	-	KT989949	-	Asterochloris glomerata	Cladonia pleurota	Austria: Koralpe	NA	NA	NA	NA
-	-	KT989950	-	Asterochloris glomerata	Cladonia pleurota	Czech Republic: Dominova Skalka	NA	NA	NA	NA
-	-	KT989951	-	Asterochloris glomerata	Cladonia pleurota	Czech Republic: Doln# Loucky	NA	NA	NA	NA
-	-	KT989952	-	Asterochloris glomerata	Cladonia pleurota	Austria: Stubalpe	NA	NA	NA	NA
-	-	KT989953	-	Asterochloris glomerata	Cladonia pleurota	Czech Republic: Brdy Mts.	NA	NA	NA	NA
-	-	KT989954	-	Asterochloris glomerata	Cladonia pleurota	Romania: Retezat Mts.	NA	NA	NA	NA
-	-	KT989955	-	Asterochloris glomerata	Cladonia pleurota	Czech Republic: Krivoklat region	NA	NA	NA	NA
-	-	KT989956	-	Asterochloris glomerata	Cladonia pleurota	Czech Republic: Chvaletice	NA	NA	NA	NA
-	-	KT989957	-	Asterochloris glomerata	Cladonia pleurota	Czech Republic: Krkonose Mts.	NA	NA	NA	NA
-	-	KT989958	-	Asterochloris glomerata	Cladonia pleurota	Czech Republic: Brdy Mts.	NA	NA	NA	NA
-	-	KT989959	-	Asterochloris glomerata	Cladonia pleurota	Czech Republic: Sedlcany region	NA	NA	NA	NA
-	-	KT989960	-	Asterochloris glomerata	Cladonia pleurota	Czech Republic: Sedlcany region	NA	NA	NA	NA
-	-	KT989961	-	Asterochloris glomerata	Cladonia deformis	Czech Republic	NA	NA	NA	NA
-	-	KT989962	-	Asterochloris glomerata	Cladonia deformis	Germany: Oberlausitzer Heide	NA	NA	NA	NA
-	-	KT989963	-	Asterochloris glomerata	Cladonia deformis	Finland: Sondby	NA	NA	NA	NA
-	-	KT989964	-	Asterochloris glomerata	Cladonia deformis	Czech Republic: Krkonose Mts.	NA	NA	NA	NA
-	-	KT989965	-	Asterochloris glomerata	Cladonia pleurota	Czech Republic	NA	NA	NA	NA
-	-	KT989966	-	Asterochloris glomerata	Cladonia deformis	Denmark: Jutland	NA	NA	NA	NA
-	-	KT989967	-	Asterochloris glomerata	Cladonia pleurota	Czech Republic: Slavkovsky les Mts	NA	NA	NA	NA
-	-	MH415266	-	Asterochloris irregularis	Stereocaulon arcticum	Iceland	terricolous	63.8685	-21.75556	0
-	-	MH415358	-	Asterochloris irregularis	Stereocaulon alpinum	Greenland, Disko Island	terricolous	69.240059	-53.542775	0
-	-	MH415359	-	Asterochloris irregularis	Stereocaulon cf. arcticum	Greenland, Disko Island	terricolous	69.240059	-53.542775	0
-	-	MH415361	-	Asterochloris irregularis	Stereocaulon alpinum	Greenland, Disko Island	terricolous	69.240059	-53.542775	0
-	-	MH415434	-	Asterochloris irregularis	Stereocaulon vesuvianum	Denmark, Faroe Islands	saxicolous	62.3501667	-6.5978611	0
-	-	MH415392	-	Asterochloris irregularis	Stereocaulon cf. paschale	Finland, Helsinki	terricolous	60.241903	25.123181	16
-	-	KY559106.	-	Asterochloris irregularis	Thamnolia sp.	Russia: Yamal peninsula	NA	68.3388889	71.3358333	23
-	-	KP314615	-	Asterochloris irregularis	Stereocaulon boryosum	Svalbard	saxicolous	78.92	11.93	24
-	-	MH415356	-	Asterochloris irregularis	Stereocaulon paschale	Greenland, Ilulissat	terricolous	69.200829	-51.066389	43
-	-	MH415360	-	Asterochloris irregularis	Stereocaulon alpinum	Greenland, Ilulissat	terricolous	69.200829	-51.066389	43
-	-	MH415362	-	Asterochloris irregularis	Stereocaulon paschale	Greenland, Ilulissat	terricolous	69.200829	-51.066389	43
-	-	MH415363	-	Asterochloris irregularis	Stereocaulon sp.	Greenland, Ilulissat	terricolous	69.200829	-51.066389	43
-	-	MH415394	-	Asterochloris irregularis	Stereocaulon alpinum	Finland	terricolous	61.495167	23.733665	77
-	-	MH415262	-	Asterochloris irregularis	Stereocaulon arcticum	Iceland	saxicolous	63.85957	-22.3474	80
-	-	MH415406	-	Asterochloris irregularis	Stereocaulon dactylophyllum	Finland	saxicolous	60.37492	24.505448	82
-	-	MH415405	-	Asterochloris irregularis	Stereocaulon vesuvianum	Norway	saxicolous	60.2924910	5.3989633	147
-	-	MH415259	-	Asterochloris irregularis	Stereocaulon arcticum	Iceland, Kleifarvatn	saxicolous	63.94037	-21.98406	149
-	-	MH415260	-	Asterochloris irregularis	Stereocaulon vesuvianum	Iceland, Kleifarvatn	saxicolous	63.94037	-21.98406	149
-	-	MH415261	-	Asterochloris irregularis	Stereocaulon vesuvianum	Iceland, Kleifarvatn	saxicolous	63.94037	-21.98406	149
-	-	MH415377	-	Asterochloris irregularis	Stereocaulon rivulorum	Denmark, Faroe Islands	NA	62.0196944	-6.8256111	204
-	-	MH415267	-	Asterochloris irregularis	Stereocaulon vesuvianum	Iceland	saxicolous	64.12108	-19.78241	238
-	-	DQ229880	-	Asterochloris irregularis	Stereocaulon botryosum	USA, Alaska, Selawik NW	saxicolous	66.439531	-157.177426	263
-	-	DQ229881	-	Asterochloris irregularis	Stereocaulon subcoralloides	USA, Alaska, Selawik NW	saxicolous	66.439531	-157.177426	263
-	-	AY622821	-	Asterochloris irregularis	Cladonia gracilis	Canada	saxicolous	53.94052847486395	-101.18853759765625	271
-	-	AY622823	-	Asterochloris irregularis	Cladonia gracilis	Canada	saxicolous	53.94052847486395	-101.18853759765625	271
-	-	AY622827	-	Asterochloris irregularis	Cladonia gracilis	Canada	saxicolous	53.94052847486395	-101.18853759765625	271
-	-	AY622828	-	Asterochloris irregularis	Cladonia gracilis	Canada	saxicolous	53.94052847486395	-101.18853759765625	271
-	-	AY622829	-	Asterochloris irregularis	Cladonia gracilis	Canada	saxicolous	53.94052847486395	-101.18853759765625	271
-	-	MH415397	-	Asterochloris irregularis	Stereocaulon symphycheilum	Czech Republic	terricolous	50.870574	14.38281	308
-	-	MH415398	-	Asterochloris irregularis	Stereocaulon symphycheilum	Czech Republic	terricolous	50.881722	14.300444	342
-	-	MH415300	-	Asterochloris irregularis	Stereocaulon vesuvianum	Iceland	saxicolous	63.72311	-19.44964	390
-	-	MH415324	-	Asterochloris irregularis	Stereocaulon sp.	USA, Alaska	terricolous	60.574207	-149.572659	406
-	-	MH415325	-	Asterochloris irregularis	Stereocaulon paschale	USA, Alaska	terricolous	60.574207	-149.572659	406
-	-	MH415328	-	Asterochloris irregularis	Stereocaulon sp.	USA, Alaska	terricolous	60.574207	-149.572659	406
-	-	MH415331	-	Asterochloris irregularis	Stereocaulon sp.	USA, Alaska	terricolous	60.574207	-149.572659	406
-	-	MH415332	-	Asterochloris irregularis	Stereocaulon paschale	USA, Alaska	terricolous	60.574207	-149.572659	406
-	-	MH415333	-	Asterochloris irregularis	Stereocaulon sp.	USA, Alaska	terricolous	60.574207	-149.572659	406
-	-	MH415265	-	Asterochloris irregularis	Stereocaulon arcticum	Iceland	terricolous	64.21289	-19.2558	410
-	-	MH415268	-	Asterochloris irregularis	Stereocaulon cf. alpinum	Iceland	saxicolous	64.21289	-19.2558	410
-	-	FM945347	-	Asterochloris irregularis	Cladonia arbuscula	Czech Republic:Gelnica	terricolous	48.8333333	20.933333333333334	500
-	-	MH415270	-	Asterochloris irregularis	Stereocaulon arcticum	Iceland	terricolous	64.83202	-14.66373	525
-	-	MH415271	-	Asterochloris irregularis	Stereocaulon arcticum	Iceland	terricolous	64.83202	-14.66373	525
-	-	MH415399	-	Asterochloris irregularis	Stereocaulon paschale	Russia, Altai Mts, Turochak	saxicolous	51.81357	87.19102	548
-	-	MH415306	-	Asterochloris irregularis	Stereocaulon sp.	Russia, Eastern Siberia	terricolous	57.98387	127.06477	586
-	-	MH415308	-	Asterochloris irregularis	Stereocaulon sp.	Russia, Eastern Siberia	terricolous	57.98387	127.06477	586
-	-	MH415309	-	Asterochloris irregularis	Stereocaulon sp.	Russia, Eastern Siberia	terricolous	57.98387	127.06477	586
-	-	MH415340	-	Asterochloris irregularis	Stereocaulon sp.	Russia, Eastern Siberia	terricolous	57.98387	127.06477	586
-	-	MH415335	-	Asterochloris irregularis	Stereocaulon paschale	USA, Alaska	terricolous	66.370472	-150.476282	596
-	-	MH415314	-	Asterochloris irregularis	Stereocaulon apocalypticum	USA, Alaska	saxicolous	63.466413	-148.808811	656
-	-	MH415315	-	Asterochloris irregularis	Stereocaulon intermedium	USA, Alaska	saxicolous	63.466413	-148.808811	656
-	-	MH415316	-	Asterochloris irregularis	Stereocaulon intermedium	USA, Alaska	saxicolous	63.466413	-148.808811	656
-	-	MH415317	-	Asterochloris irregularis	Stereocaulon intermedium	USA, Alaska	saxicolous	63.466413	-148.808811	656
-	-	MH415318	-	Asterochloris irregularis	Stereocaulon paschale	USA, Alaska	saxicolous	63.466413	-148.808811	656
-	-	MH415319	-	Asterochloris irregularis	Stereocaulon paschale	USA, Alaska	saxicolous	63.466413	-148.808811	656
-	-	MH415320	-	Asterochloris irregularis	Stereocaulon paschale	USA, Alaska	saxicolous	63.466413	-148.808811	656
-	-	MH415321	-	Asterochloris irregularis	Stereocaulon apocalypticum	USA, Alaska	saxicolous	63.466413	-148.808811	656
-	-	MH415368	-	Asterochloris irregularis	Stereocaulon tomentosum/ sasakii	USA, Alaska	NA	63.3	-149.00000	858
-	-	MH415205	-	Asterochloris irregularis	Stereocaulon vesuvianum	Slovakia: Nizke Tatry Mts, Spania dolina	saxicolous	48.808947	19.134917	860
-	-	MH415310	-	Asterochloris irregularis	Stereocaulon vesuvianum	Czech Republic, Jizerské hory Mts	saxicolous	50.853333	15.224722	922
-	-	MH415413	-	Asterochloris irregularis	Stereocaulon vesuvianum	Czech Republic, Krušné	saxicolous	50.384092	12.891422	994
-	-	MH415336	-	Asterochloris irregularis	Stereocaulon sp.	USA, Alaska	saxicolous	63.48861	-148.78547	1058
-	-	MH415387	-	Asterochloris irregularis	Stereocaulon vesuvianum	Czech Republic, Krkonoše	saxicolous	50.760844	15.642404	1071
-	-	MH415279	-	Asterochloris irregularis	Stereocaulon sp.	Austria, Stubaithal		47.104488	11.295766	1435
-	-	MH415326	-	Asterochloris irregularis	Stereocaulon botryosum	USA, Alaska	terricolous	68.129396	-149.475919	1536
-	-	MH415327	-	Asterochloris irregularis	Stereocaulon sp.	USA, Alaska	terricolous	68.129396	-149.475919	1536
-	-	MH415369	-	Asterochloris irregularis	Stereocaulon symphycheilum	Austria, Styria	saxicolous	47.084722	14.547222	1883
-	-	MH415272	-	Asterochloris irregularis	Stereocaulon vesuvianum	Japan, Fuji Mt	saxicolous	35.352726	138.736932	2929
-	-	AF345408	-	Asterochloris irregularis	Cladonia cenotea	Russia	NA	NA	NA	NA
-	-	AF345409	-	Asterochloris irregularis	Cladonia coccifera	Russia: Karelia	NA	NA	NA	NA
-	-	AF345410	-	Asterochloris irregularis	Cladina stellaris	Finland	NA	NA	NA	NA
-	-	AM906000	-	Asterochloris irregularis	Cladonia arbuscula	Slovakia:Gelnica	NA	NA	NA	NA
-	-	KT989923	-	Asterochloris irregularis	Cladonia pleurota	Czech Republic: Brdy Mts.	NA	NA	NA	NA
-	-	KT989924	-	Asterochloris irregularis	Cladonia pleurota	Czech Republic: Brdy Mts.	NA	NA	NA	NA
-	-	KT989925	-	Asterochloris irregularis	Cladonia pleurota	Finland: Helsinki	NA	NA	NA	NA
-	-	KT989926	-	Asterochloris irregularis	Cladonia pleurota	Finland: Vantaa	NA	NA	NA	NA
-	-	KT989927	-	Asterochloris irregularis	Cladonia diversa	Belgium: Kalmthout	NA	NA	NA	NA
-	-	KT989928	-	Asterochloris irregularis	Cladonia deformis	Finland: Varkaus	NA	NA	NA	NA
-	-	KT989929.	-	Asterochloris irregularis	Cladonia coccifera	Finland: Heinola	NA	NA	NA	NA
-	-	KT989930	-	Asterochloris irregularis	Cladonia coccifera	Finland: Sondby	NA	NA	NA	NA
-	-	KT989931	-	Asterochloris irregularis	Cladonia pleurota	Norway: Rondane NP	NA	NA	NA	NA
-	-	KT989932	-	Asterochloris irregularis	Cladonia deformis	Czech Republic: Jested	NA	NA	NA	NA
-	-	KT989933	-	Asterochloris irregularis	Cladonia coccifera	Czech Republic: Krkonose Mts.	NA	NA	NA	NA
-	-	KT989934	-	Asterochloris irregularis	Cladonia pleurota	Norway	NA	NA	NA	NA
-	-	KT989935	-	Asterochloris irregularis	Cladonia pleurota	Czech Republic: Brdy Mts.	NA	NA	NA	NA
-	-	MK620072	-	Asterochloris irregularis	Porpidia flavicunda	Norway: Svalbard	NA	NA	NA	NA
-	-	MH415439	-	Asterochloris italiana	Stereocaulon rivulorum	Denmark, Faroe Islands	NA	62.0196944	-6.8256111	0
-	-	MH415339	-	Asterochloris italiana	Stereocaulon condensatum	Germany, Hesse	terricolous	50.34541	18.087378	168
-	-	MH415230	-	Asterochloris italiana	Stereocaulon azoreum	Portugal, Madeira	saxicolous	32.745833	-16.858867	841
-	-	MH415423	-	Asterochloris italiana	Stereocaulon azoreum	Portugal, Madeira	terricolous	32.829467	-17.190556	900
-	-	MH415231	-	Asterochloris italiana	Stereocaulon azoreum	Portugal, Madeira	terricolous	32.759017	-17.054433	1094
-	-	MH415254	-	Asterochloris italiana	Stereocaulon azoreum	Portugal, Madeira	saxicolous	32.728867	-16.880083	1175
-	-	MH415253	-	Asterochloris italiana	Stereocaulon azoreum	Portugal, Madeira	saxicolous	32.741533	-16.890233	1250
-	-	MH415246	-	Asterochloris italiana	Stereocaulon azoreum	Portugal, Madeira	terricolous	32.749317	-16.9323	1408
-	-	AF345420	-	Asterochloris italiana	Cladonia glauca	Denmark	NA	NA	NA	NA
-	-	AF345421	-	Asterochloris italiana	Cladonia capitellata	Australia	NA	NA	NA	NA
-	-	AF345422	-	Asterochloris italiana	Cladonia staufferi	Australia	NA	NA	NA	NA
-	-	AF345438	-	Asterochloris italiana	Cladonia ochrochlora	Australia	NA	NA	NA	NA
-	-	KM250372	-	Asterochloris italiana	Pilophorus clavatus	South Korea	saxicolous	NA	NA	NA
-	-	KT989888.	-	Asterochloris italiana	Cladonia coccifera	Czech Republic: Luzicke hory	NA	NA	NA	NA
-	-	KT989889	-	Asterochloris italiana	Cladonia diversa	Czech Republic: Ceskosaske Svycarsko	NA	NA	NA	NA
-	-	KT989890	-	Asterochloris italiana	Cladonia coccifera	Czech Republic: Sedlcany region	NA	NA	NA	NA
-	-	KT989891	-	Asterochloris italiana	Cladonia diversa	Denmark: Bornholm	NA	NA	NA	NA
-	-	KT989892	-	Asterochloris italiana	Cladonia diversa	Belgium: Kalmthout	NA	NA	NA	NA
-	-	KT989893	-	Asterochloris italiana	Cladonia diversa	Netherlands	NA	NA	NA	NA
-	-	KT989894	-	Asterochloris italiana	Cladonia diversa	Spain: Asturias	NA	NA	NA	NA
-	-	KT989895	-	Asterochloris italiana	Cladonia diversa	Norway	NA	NA	NA	NA
-	-	KT989896	-	Asterochloris italiana	Cladonia coccifera	United Kingdom: Wales, Ty Canol	NA	NA	NA	NA
-	-	KT989897	-	Asterochloris italiana	Cladonia coccifera	United Kingdom: Wales	NA	NA	NA	NA
-	-	KT989898	-	Asterochloris italiana	Cladonia pleurota	Austria: Koralpe	NA	NA	NA	NA
-	-	KT989899	-	Asterochloris italiana	Cladonia diversa	Czech Republic: Tabor region	NA	NA	NA	NA
-	-	KT989900	-	Asterochloris italiana	Cladonia diversa	Denmark: Jutland	NA	NA	NA	NA
-	-	KT989901	-	Asterochloris italiana	Cladonia coccifera	Denmark: Jutland	NA	NA	NA	NA
-	-	KT989902	-	Asterochloris italiana	Cladonia diversa	Denmark	NA	NA	NA	NA
-	-	KT989903	-	Asterochloris italiana	Cladonia diversa	Spain	NA	NA	NA	NA
-	-	KT989904	-	Asterochloris italiana	Cladonia coccifera	Norway	NA	NA	NA	NA
-	-	AM906003	-	Asterochloris leprarii	Lepraria caesioalba	Czech Republic:Sumava Mts., Povydr	NA	NA	NA	NA
-	-	AM906004	-	Asterochloris leprarii	Lepraria caesioalba	Czech Republic:Sumava Mts., Povydri	NA	NA	NA	NA
-	-	AM906005	-	Asterochloris leprarii	Lepraria neglecta	Czech Republic:Sumava Mts., Obri hrad Mt.	NA	NA	NA	NA
-	-	AY712708	-	Asterochloris lobophora	Cladonia leporina	USA: Highlands County, FL	NA	26.67163739599027	-80.88760030156251	6
-	-	AY712710	-	Asterochloris lobophora	Cladonia pachycladodes	USA: Highlands County, FL	NA	26.67163739599027	-80.88760030156251	6
-	-	AY712709	-	Asterochloris lobophora	Cladonia prostrata	USA: Highlands County, FL	NA	27.06487465117238	-80.95763814335939	7
-	-	AY712707	-	Asterochloris lobophora	Cladonia pachycladodes	USA: Polk County, FL	NA	27.617719070802455	-81.12380635625001	20
-	-	FM945354	-	Asterochloris lobophora	Cladonia coniocraea	Czech Republic:East Bohemia, sedimentation basin		50.0412714	15.444266944444445	250
-	-	FM945356	-	Asterochloris lobophora	Cladonia rei	Czech Republic:East Bohemia, sedimentation basin	terricolous	50.0412714	15.444266944444445	250
-	-	FM945366	-	Asterochloris lobophora	Cladonia macilenta	Czech Republic:East Bohemia, sedimentation basin		50.0412714	15.444266944444445	250
-	-	FM945379	-	Asterochloris lobophora	Cladonia subulata	Czech Republic:East Bohemia, sedimentation basin		50.0412714	15.444266944444445	250
-	-	FM945390	-	Asterochloris lobophora	Diploschistes muscorum	Czech Republic:East Bohemia, sedimentation basin		50.0412714	15.444266944444445	250
-	-	KP318673	-	Asterochloris lobophora	Diploschistes muscorum	Czech Republic: Luzicke hory Mts.	NA	50.805485	14.858081	383
-	-	FM945369	-	Asterochloris lobophora	Cladonia ochrochlora	Czech Republic: Harmanec	NA	48.8166667	19.5	500
-	-	FM945373	-	Asterochloris lobophora	Cladonia pyxidata	Czech Republic:Gelnica	terricolous	48.8333333	20.933333333333334	500
-	-	FM945377	-	Asterochloris lobophora	Cladonia rangiformis	Czech Republic:Gelnica	saxicolous	48.8333333	20.933333333333334	500
-	-	FM945391	-	Asterochloris lobophora	Stereocaulon tomentosum	Slovakia, Volovské vrchy Mts, Gelnica	terricolous	48.8333333	20.933333333333334	500
-	-	FM945387	-	Asterochloris lobophora	Cladonia rei	Czech Republic: L’ubietov	terricolous	48.75	19.366666666666667	570
-	-	FN556045	-	Asterochloris lobophora	Lepraria caesioalba	Czech Republic	saxicolous	NA	NA	600
-	-	FM945382	-	Asterochloris lobophora	Cladonia rei	czech republic: Spania dolina	NA	48.808947	19.13491	780
-	-	MH415206	-	Asterochloris lobophora	Stereocaulon nanodes	Slovakia: Nizke Tatry Mts, Spania dolina	saxicolous	48.808947	19.134917	860
-	-	MH415297	-	Asterochloris lobophora	Stereocaulon alpinum	Georgia	terricolous	42.502231	45.291398	3274
-	-	MH415298	-	Asterochloris lobophora	Stereocaulon alpinum	Georgia	terricolous	42.516667	45.25	3274
-	-	MH415299	-	Asterochloris lobophora	Stereocaulon alpinum	Georgia	terricolous	42.517599	45.275016	3274
-	-	AM906006	-	Asterochloris lobophora	Lepraria caesioalba	Czech Republic: Jesenicka pahorkatina hilly country, Vladar Mt.	NA	NA	NA	NA
-	-	AM906007	-	Asterochloris lobophora	Lepraria cf. caesioalba	Czech Republic: Doupovske vrchy Mts., Velka hill	NA	NA	NA	NA
-	-	AM906009	-	Asterochloris lobophora	Lepraria caesioalba	Czech Republic: Sumava Mts., rock near Rejstejn	NA	NA	NA	NA
-	-	AM906010	-	Asterochloris lobophora	Lepraria alpina	Czech Republic: Sumava Mts., Rybarna	NA	NA	NA	NA
-	-	AM906011	-	Asterochloris lobophora	Diploschistes muscorum	Czech Republic:Sumava Mts., Safaruv vrsek Mt.	NA	NA	NA	NA
-	-	AY842280	-	Asterochloris lobophora	Cladonia perforata	USA: Florida	NA	NA	NA	NA
-	-	DQ482671	-	Asterochloris lobophora	Cladonia subtenuis	USA: Missouri, Hughes Mtn	NA	NA	NA	NA
-	-	DQ530179	-	Asterochloris lobophora	Cladonia coniocraea	Canada	NA	NA	NA	NA
-	-	DQ530184.	-	Asterochloris lobophora	Cladonia pocillum	Canada	NA	NA	NA	NA
-	-	DQ530185.	-	Asterochloris lobophora	Cladonia macrophyllodes	Canada	NA	NA	NA	NA
-	-	DQ530189	-	Asterochloris lobophora	Cladonia fimbriata	Canada	NA	NA	NA	NA
-	-	KP318672	-	Asterochloris lobophora	Diploschistes muscorum	Slovakia: Povazsky Inovec Mts.	NA	NA	NA	NA
-	-	KP318674	-	Asterochloris lobophora	Cladonia coccifera	Czech Republic: Sumava Mts.	NA	NA	NA	NA
-	-	KT989906	-	Asterochloris lobophora	Cladonia diversa	Czech Republic: Hradiste	NA	NA	NA	NA
-	-	KT989907	-	Asterochloris lobophora	Cladonia coccifera	Czech Republic: Brdy Mts.	NA	NA	NA	NA
-	-	KP257392	-	Asterochloris mediterranea	Cladonia convoluta/foliacea	Spain: Valencia, Algar de Palancia	saxicolous	39.77	-0.388333	208
-	-	KP257394	-	Asterochloris mediterranea	Cladonia rangiformis	Spain: Lanzarote, Haria	saxicolous	29.1253	-13.5236	270
-	-	KP257381	-	Asterochloris mediterranea	Cladonia convoluta/foliacea	Spain: Zaragoza, Bujaraloz	saxicolous	41.8169	-0.424444	351
-	-	KP257382	-	Asterochloris mediterranea	Cladonia convoluta/foliacea	Spain: Zaragoza, Bujaraloz	saxicolous	41.8169	-0.424444	351
-	-	KP257383	-	Asterochloris mediterranea	Cladonia convoluta/foliacea	Spain: Zaragoza, Bujaraloz	saxicolous	41.8169	-0.424444	351
-	-	KP257385	-	Asterochloris mediterranea	Cladonia convoluta/foliacea	Spain: Caceres, Villareal de San Carlos	saxicolous	39.8458	-6.02806	402
-	-	KP257386	-	Asterochloris mediterranea	Cladonia convoluta/foliacea	Spain: Caceres, Villareal de San Carlos	saxicolous	39.8458	-6.02806	402
-	-	KP257387	-	Asterochloris mediterranea	Cladonia convoluta/foliacea	Spain: Caceres, Villareal de San Carlos	saxicolous	39.8458	-6.02806	402
-	-	KP257395	-	Asterochloris mediterranea	Cladonia rangiformis	Spain: Caceres, Villareal de San Carlos	saxicolous	39.8458	-6.02806	402
-	-	KP257397	-	Asterochloris mediterranea	Cladonia cervicornis s. str.	Spain: Caceres, Villareal de San Carlos	saxicolous	39.8458	-6.02806	402
-	-	KP257398	-	Asterochloris mediterranea	Cladonia cervicornis s. str.	Spain: Caceres, Villareal de San Carlos	saxicolous	39.8458	-6.02806	402
-	-	KP257379	-	Asterochloris mediterranea	Cladonia convoluta/foliacea	Spain: Almeria, Sorbas	saxicolous	37.1462	-2.14583	415
-	-	KP257380	-	Asterochloris mediterranea	Cladonia convoluta/foliacea	Spain: Almeria, Sorbas	saxicolous	37.1462	-2.14583	415
-	-	KP257396	-	Asterochloris mediterranea	Cladonia cervicornis s. str.	Spain: Castellon, Chovar	saxicolous	39.8539	-0.320278	415
-	-	KP257393	-	Asterochloris mediterranea	Cladonia rangiformis	Spain: Tenerife, Arico	saxicolous	28.4119	-16.4244	560
-	-	KP257366	-	Asterochloris mediterranea	Cladonia convoluta/foliacea	Spain: Madrid, Fuentiduena de Tajo	saxicolous	40.1312	-3.15333	571
-	-	KP257367	-	Asterochloris mediterranea	Cladonia convoluta/foliacea	Spain: Madrid, Fuentiduena de Tajo	saxicolous	40.1312	-3.15333	571
-	-	KP257368	-	Asterochloris mediterranea	Cladonia convoluta/foliacea	Spain: Madrid, Fuentiduena de Tajo	saxicolous	40.1312	-3.15333	571
-	-	KP257369	-	Asterochloris mediterranea	Cladonia convoluta/foliacea	Spain: Madrid, Fuentiduena de Tajo	saxicolous	40.1312	-3.15333	571
-	-	KP257370	-	Asterochloris mediterranea	Cladonia convoluta/foliacea	Spain: Madrid, Fuentiduena de Tajo	saxicolous	40.1312	-3.15333	571
-	-	KP257371	-	Asterochloris mediterranea	Cladonia convoluta/foliacea	Spain: Madrid, Fuentiduena de Tajo	saxicolous	40.1312	-3.15333	571
-	-	KP257372	-	Asterochloris mediterranea	Cladonia convoluta/foliacea	Spain: Madrid, Fuentiduena de Tajo	saxicolous	40.1312	-3.15333	571
-	-	KP257373	-	Asterochloris mediterranea	Cladonia convoluta/foliacea	Spain: Madrid, Fuentiduena de Tajo	saxicolous	40.1312	-3.15333	571
-	-	KP257374	-	Asterochloris mediterranea	Cladonia convoluta/foliacea	Spain: Madrid, Fuentiduena de Tajo	saxicolous	40.1312	-3.15333	571
-	-	KP257375	-	Asterochloris mediterranea	Cladonia convoluta/foliacea	Spain: Madrid, Fuentiduena de Tajo	saxicolous	40.1312	-3.15333	571
-	-	KP257376	-	Asterochloris mediterranea	Cladonia convoluta/foliacea	Spain: Madrid, Fuentiduena de Tajo	saxicolous	40.1312	-3.15333	571
-	-	KP257377	-	Asterochloris mediterranea	Cladonia convoluta/foliacea	Spain: Madrid, Fuentiduena de Tajo	saxicolous	40.1312	-3.15333	571
-	-	KP257378	-	Asterochloris mediterranea	Cladonia convoluta/foliacea	Spain: Madrid, Fuentiduena de Tajo	saxicolous	40.1312	-3.15333	571
-	-	KP257391	-	Asterochloris mediterranea	Cladonia convoluta/foliacea	Spain: Teruel, Rubielos de Mora	saxicolous	40.2272	-0.708333	932
-	-	KX592504	-	Asterochloris mediterranea	Ramalina farinacea	Spain: Canary Island,Tenerife,Los realejos	corticolous	28.3439833	-16.577861111111112	950
-	-	KX592505	-	Asterochloris mediterranea	Ramalina farinacea	Spain: Canary Island,Tenerife,Los realejos	corticolous	28.3439833	-16.577861111111112	950
-	-	KX592506	-	Asterochloris mediterranea	Ramalina farinacea	Spain: Canary Island,Tenerife,Los realejos	corticolous	28.3439833	-16.577861111111112	950
-	-	KX592507	-	Asterochloris mediterranea	Ramalina farinacea	Spain: Canary Island,Tenerife,Los realejos	corticolous	28.3439833	-16.577861111111112	950
-	-	KX592508	-	Asterochloris mediterranea	Ramalina farinacea	Spain: Canary Island,Tenerife,Los realejos	corticolous	28.3439833	-16.577861111111112	950
-	-	KX592509	-	Asterochloris mediterranea	Ramalina farinacea	Spain: Canary Island,Tenerife,Los realejos	corticolous	28.3439833	-16.577861111111112	950
-	-	KX592511	-	Asterochloris mediterranea	Ramalina farinacea	Spain: Canary Island,Tenerife,Los realejos	corticolous	28.3439833	-16.577861111111112	950
-	-	KX592512	-	Asterochloris mediterranea	Ramalina farinacea	Spain: Canary Island,Tenerife,Los realejos	corticolous	28.3439833	-16.577861111111112	950
-	-	KX592513	-	Asterochloris mediterranea	Ramalina farinacea	Spain: Canary Island,Tenerife,Los realejos	corticolous	28.3439833	-16.577861111111112	950
-	-	KX592514	-	Asterochloris mediterranea	Ramalina farinacea	Spain: Canary Island,Tenerife,Los realejos	corticolous	28.3439833	-16.577861111111112	950
-	-	KX592515	-	Asterochloris mediterranea	Ramalina farinacea	Spain: Canary Island,Tenerife,Los realejos	corticolous	28.3439833	-16.577861111111112	950
-	-	KX592516	-	Asterochloris mediterranea	Ramalina farinacea	Spain: Canary Island,Tenerife,Los realejos	corticolous	28.3439833	-16.577861111111112	950
-	-	KX592517	-	Asterochloris mediterranea	Ramalina farinacea	Spain: Canary Island,Tenerife,Los realejos	corticolous	28.3439833	-16.577861111111112	950
-	-	KX592518	-	Asterochloris mediterranea	Ramalina farinacea	Spain: Canary Island,Tenerife,Los realejos	corticolous	28.3439833	-16.577861111111112	950
-	-	KX592519	-	Asterochloris mediterranea	Ramalina farinacea	Spain: Canary Island,Tenerife,Los realejos	corticolous	28.3439833	-16.577861111111112	950
-	-	KX592520	-	Asterochloris mediterranea	Ramalina farinacea	Spain: Canary Island,Tenerife,Los realejos	corticolous	28.3439833	-16.577861111111112	950
-	-	KX592521	-	Asterochloris mediterranea	Ramalina farinacea	Spain: Canary Island,Tenerife,Los realejos	corticolous	28.3439833	-16.577861111111112	950
-	-	KX592522	-	Asterochloris mediterranea	Ramalina farinacea	Spain: Canary Island,Tenerife,Los realejos	corticolous	28.3439833	-16.577861111111112	950
-	-	KX592523	-	Asterochloris mediterranea	Ramalina farinacea	Spain: Canary Island,Tenerife,Los realejos	corticolous	28.3439833	-16.577861111111112	950
-	-	KX592524	-	Asterochloris mediterranea	Ramalina farinacea	Spain: Canary Island,Tenerife,Los realejos	corticolous	28.3439833	-16.577861111111112	950
-	-	KX592525	-	Asterochloris mediterranea	Ramalina farinacea	Spain: Canary Island,Tenerife,Los realejos	corticolous	28.3439833	-16.577861111111112	950
-	-	KX592526	-	Asterochloris mediterranea	Ramalina farinacea	Spain: Canary Island,Tenerife,Los realejos	corticolous	28.3439833	-16.577861111111112	950
-	-	KX592527	-	Asterochloris mediterranea	Ramalina farinacea	Spain: Canary Island,Tenerife,Los realejos	corticolous	28.3439833	-16.577861111111112	950
-	-	KX592528	-	Asterochloris mediterranea	Ramalina farinacea	Spain: Canary Island,Tenerife,Los realejos	corticolous	28.3439833	-16.577861111111112	950
-	-	KP257390	-	Asterochloris mediterranea	Cladonia convoluta/foliacea	Spain: Teruel, Mora de Rubielos	saxicolous	40.2428	-0.740556	1039
-	-	KP257388	-	Asterochloris mediterranea	Cladonia convoluta/foliacea	Spain: Teruel, Puebla de Valverde	saxicolous	40.1975	-0.916944	1130
-	-	KP257389	-	Asterochloris mediterranea	Cladonia convoluta/foliacea	Spain: Teruel, Rubielos de Mora, Mijares river	saxicolous	40.1975	-0.916944	1130
-	-	EU008683	-	Asterochloris mediterranea	Lepraria nylanderiana	Italy	NA	NA	NA	NA
-	-	AF345434	-	Asterochloris mediterranea	Cladonia fimbriata	Sweden, Gothenburg	NA	NA	NA	NA
-	-	AF345435	-	Asterochloris mediterranea	Cladonia rangiformis	Yugoslavia	NA	NA	NA	NA
-	-	EU008683	-	Asterochloris mediterranea	Lepraria nylanderiana	Italy	NA	NA	NA	NA
-	-	FM205720	-	Asterochloris mediterranea	Cladonia convoluta/foliacea	Portugal:Alto Alentejo	NA	NA	NA	NA
-	-	KT215300	-	Asterochloris mediterranea	Cladonia symphycarpa	Sweden: Oland, Drostorp	NA	NA	NA	NA
-	-	KT215301	-	Asterochloris mediterranea	Cladonia symphycarpa	Sweden: Oland, Drostorp	NA	NA	NA	NA
-	-	KT215302	-	Asterochloris mediterranea	Cladonia symphycarpa	Sweden: Oland, Drostorp	NA	NA	NA	NA
-	-	KT215303	-	Asterochloris mediterranea	Diploschistes muscorum	Sweden: Oland, Drostorp	NA	NA	NA	NA
-	-	KT215304	-	Asterochloris mediterranea	Diploschistes muscorum	Sweden: Oland, Drostorp	NA	NA	NA	NA
-	-	KT215305	-	Asterochloris mediterranea	Diploschistes muscorum	Sweden: Oland, Drostorp	NA	NA	NA	NA
-	-	KT215306	-	Asterochloris mediterranea	Cladonia symphycarpa	Germany: Bavaria, Gossenheim 'Ruine Homburg'	NA	NA	NA	NA
-	-	KT215307	-	Asterochloris mediterranea	Cladonia symphycarpa	Germany: Bavaria, Gossenheim 'Ruine Homburg'	NA	NA	NA	NA
-	-	KT215308	-	Asterochloris mediterranea	Cladonia symphycarpa	Germany: Bavaria, Gossenheim 'Ruine Homburg'	NA	NA	NA	NA
-	-	KT215309	-	Asterochloris mediterranea	Cladonia symphycarpa	Sweden: Oland, Gynge Alvar	NA	NA	NA	NA
-	-	KT215310	-	Asterochloris mediterranea	Cladonia symphycarpa	Sweden: Oland, Gynge Alvar	NA	NA	NA	NA
-	-	KT215311	-	Asterochloris mediterranea	Cladonia symphycarpa	Sweden: Oland, Gynge Alvar	NA	NA	NA	NA
-	-	KT215312	-	Asterochloris mediterranea	Diploschistes muscorum	Sweden: Oland, Gynge Alvar	NA	NA	NA	NA
-	-	FN556023	-	Asterochloris phycobiontica	Lepraria alpina	Czech Republic	NA	NA	NA	960
-	-	FN556024	-	Asterochloris phycobiontica	Lepraria caesioalba	Czech Republic	NA	NA	NA	1200
-	-	GU017647	-	Asterochloris phycobiontica	Varicellaria carneonivea	Italy: Trento, Madonna di Campigilo	NA	46.231886	10.829	1777
-	-	MH415334	-	Asterochloris phycobiontica	Stereocaulon alpinum	Austria, Tyrol	terricolous	46.95984	10.972236	2261
-	-	AM900491	-	Asterochloris phycobiontica	Lepraria neglecta	Ukraine: East Carpathians, Breskul Mountain	NA	NA	NA	NA
-	-	AM906013	-	Asterochloris phycobiontica	Lepraria neglecta	Ukraine: East Carpathians, Hoverla Mt.	NA	NA	NA	NA
-	-	MH415383	-	Asterochloris woessiae	Stereocaulon alpinum	Denmark, Faroe Islands	terricolous	62.3105833	-7.1059167	0
-	-	MH415424	-	Asterochloris woessiae	Stereocaulon azoreum	Portugal, Madeira	terricolous	32.849795	-17.210457	0
-	-	MH415379	-	Asterochloris woessiae	Stereocaulon sp.	Denmark, Faroe Islands	muscicolous	62.3173611	-7.1034444	0
-	-	FM945348	-	Asterochloris woessiae	Cladonia humilis	Czech Republic:East Bohemia, sedimentation basin		50.0412714	15.444266944444445	250
-	-	FM945350	-	Asterochloris woessiae	Cladonia humilis	Czech Republic:East Bohemia, sedimentation basin		50.0412714	15.444266944444445	250
-	-	FM945385	-	Asterochloris woessiae	Cladonia subulata	Czech Republic:East Bohemia, sedimentation basin		50.0412714	15.444266944444445	250
-	-	MH415419	-	Asterochloris woessiae	Stereocaulon azoreum	Portugal, Madeira	terricolous	32.796111	-17.183689	900
-	-	MH415425	-	Asterochloris woessiae	Stereocaulon pileatum	Portugal, Madeira	saxicolous	32.796111	-17.183689	900
-	-	MH415426	-	Asterochloris woessiae	Stereocaulon pileatum	Portugal, Madeira	saxicolous	32.796111	-17.183689	900
-	-	KX592510	-	Asterochloris woessiae	Ramalina farinacea	Spain: Canary Island,Tenerife,Los realejos	corticolous	28.3439833	-16.577861111111112	950
-	-	KP318667	-	Asterochloris woessiae	Stereocaulon cf. azoreum	Spain, Canary Islands, La Gomera	saxicolous	28.108417	-17.253611	1060
-	-	MH415232	-	Asterochloris woessiae	Stereocaulon azoreum	Portugal, Madeira	saxicolous	32.763533	-16.92975	1250
-	-	MH415235	-	Asterochloris woessiae	Stereocaulon azoreum	Portugal, Madeira	saxicolous	32.763133	-16.93295	1250
-	-	MH415256	-	Asterochloris woessiae	Stereocaulon azoreum	Portugal, Madeira	saxicolous	32.770317	-16.947617	1250
-	-	MH415418	-	Asterochloris woessiae	Stereocaulon azoreum	Portugal, Madeira	saxicolous	32.765147	-16.92206	1250
-	-	MH415234	-	Asterochloris woessiae	Stereocaulon sp.	Portugal, Madeira		32.763133	-16.93295	1250
-	-	MH415237	-	Asterochloris woessiae	Stereocaulon sp.	Portugal, Madeira	saxicolous	32.76125	-16.935783	1250
-	-	MH415244	-	Asterochloris woessiae	Stereocaulon sp.	Portugal, Madeira	saxicolous	32.747383	-16.9339	1408
-	-	AM906014	-	Asterochloris woessiae	Lepraria caesioalba	Czech Republic:Krivoklatsko Nature Reserve,valley of Uporsky brook	NA	NA	NA	NA
-	-	AM906015	-	Asterochloris woessiae	Lepraria borealis	Bulgaria: Stara planina Mts, Central Balkan National Park	NA	NA	NA	NA
-	-	EU008667	-	Asterochloris woessiae	Lepraria caesioalba	Spain	NA	NA	NA	NA
-	-	AM906016	-	Asterochloris woessiae	Cladonia foliacea	Czech Republic:Central Bohemia, Maslovicka stran Nature Reserve	NA	NA	NA	NA
-	-	KP318669	-	Asterochloris woessiae	Cladonia coccifera	Spain: Somosierra	NA	NA	NA	NA
-	-	FM945355	-	Clade 12	Cladonia rei	Czech Republic, East Bohemia, Chvaletice	terricolous	50.0363411	15.44485	250
-	-	FM945384	-	Clade 12	Cladonia subulata	Czech Republic, East Bohemia, Chvaletice	terricolous	50.0363411	15.44485	250
-	-	FM945389	-	Clade 12	Diploschistes muscorum	Czech Republic, East Bohemia, Chvaletice	terricolous	50.0363411	15.44485	250
-	-	MH415322	-	Clade 12	Stereocaulon rivulorum	Alaska	terricolous	62.739173	-150.118637	419
-	-	FM945359	-	Clade 12	Cladonia fimbriata	Czech Republic: Harmanec	NA	48.8166667	19.5	500
-	-	FM945361	-	Clade 12	Cladonia furcata	Czech Republic:Gelnica	terricolous	48.8333333	20.933333333333334	500
-	-	FM945374	-	Clade 12	Cladonia pyxidata	Czech Republic:Gelnica	terricolous	48.8333333	20.933333333333334	500
-	-	FM945375	-	Clade 12	Cladonia pyxidata	Czech Republic: Harmanec	saxicolous	48.8166667	19.5	500
-	-	FM945362	-	Clade 12	Cladonia furcata	Czech Republic: L’ubietov	terricolous	48.75	19.366666666666667	570
-	-	MH415395	-	Clade 12	Stereocaulon dactylophyllum	Czech Republic, Slavkovský les	muscicolous	50.06513	12.750625	746
-	-	FM945360	-	Clade 12	Cladonia furcata	czech republic: Spania dolina	terricolous	48.808947	19.13491	780
-	-	FM945381	-	Clade 12	Cladonia rei	czech republic: Spania dolina	terricolous	48.808947	19.13491	780
-	-	HE803050	-	Clade 12	Cladonia pyxidata	India	terricolous	30.9928611	78.93922222222223	3118
-	-	DQ530180	-	Clade 12	Cladonia cornuta	Canada	NA	NA	NA	NA
-	-	DQ530190	-	Clade 12	Cladonia pocillum	Canada	NA	NA	NA	NA
-	-	AF345431	-	Clade 8	Cladonia chlorophaea	Canada: Nove Scotia	NA	44.415606	-65.088607	116
-	-	FM945365	-	Clade 8	Cladonia macilenta	Czech Republic, East Bohemia, Chvaletice	terricolous	50.0363411	15.44485	250
-	-	FM945383--	-	Clade 8	Cladonia subulata	Czech Republic, East Bohemia, Chvaletice	terricolous	50.0363411	15.44485	250
-	-	MH415451	-	Clade 8	Stereocaulon dactylophyllum	Czech Republic, Lužické hory Mts, Javor Mt.	saxicolous	50.828765	14.504255	523
-	-	FM945386	-	Clade 8	Cladonia rei	Czech Republic: L’ubietov	terricolous	48.75	19.366666666666667	570
-	-	MH415415	-	Clade 8	Stereocaulon cf. grande	Canada	terricolous	49.693841	-125.364318	1168
-	-	AF345430	-	Clade 8	Cladonia symphycarpa	Finland	NA	NA	NA	NA
-	-	AF345432	-	Clade 8	Cladonia farinacea	USA: New York	NA	NA	NA	NA
-	-	DQ482678	-	Clade 8	Cladonia subtenuis	USA: North Carolina, Wake County, Lizard Lick	NA	NA	NA	NA
-	-	DQ482679	-	Clade 8	Cladonia subtenuis	USA: Virginia, Amherst County, Naola	NA	NA	NA	NA
-	-	DQ482680	-	Clade 8	Cladonia subtenuis	USA: Pennsylvania, Lancaster County, New Texas	NA	NA	NA	NA
-	-	DQ530188	-	Clade 8	Cladonia chlorophaea	Canada	NA	NA	NA	NA
-	-	KT989916	-	Clade 8	Cladonia coccifera	Austria: Stubalpe	NA	NA	NA	NA
-	-	KT989917	-	Clade 8	Cladonia coccifera	Czech Republic: Jested	NA	NA	NA	NA
-	-	KT989918	-	Clade 8	Cladonia coccifera	Czech Republic: Krkonose	NA	NA	NA	NA
-	-	AY712697	-	Clade 9	Cladonia subtenuis	USA: Okaloosa County, FL	NA	30.43813	-86.416827	0
-	-	AY712698	-	Clade 9	Cladonia subtenuis	USA: Okaloosa County, FL	NA	30.43813	-86.416827	0
-	-	AY712699	-	Clade 9	Cladonia subtenuis	USA: Okaloosa County, FL	NA	30.43813	-86.416827	0
-	-	AY712690	-	Clade 9	Cladonia subtenuis	USA: Highlands County, FL	NA	26.67163739599027	-80.88760030156251	6
-	-	AY712692	-	Clade 9	Cladonia evansii	USA: Highlands County, FL	NA	26.67163739599027	-80.88760030156251	6
-	-	AY712695	-	Clade 9	Cladonia leporina	USA: Highlands County, FL	NA	26.67163739599027	-80.88760030156251	6
-	-	AY712700	-	Clade 9	Cladonia subtenuis	USA: Highlands County, FL	NA	26.67163739599027	-80.88760030156251	6
-	-	AY712696	-	Clade 9	Cladonia evansii	USA: Highlands County, FL	NA	27.06487465117238	-80.95763814335939	7
-	-	AY712693	-	Clade 9	Cladonia evansii	USA: Highlands County, FL	NA	26.80924203078639	-81.00707661992189	8
-	-	AY842279	-	Clade 9	Cladina confusa	Brazil: Parana State	terricolous	-25.5347222	-48.34166666666667	13
-	-	AY712691	-	Clade 9	Cladonia evansii	USA: Polk County, FL	NA	27.617719070802455	-81.12380635625001	20
-	-	AY712694	-	Clade 9	Cladonia subtenuis	USA: Polk County, FL	NA	27.617719070802455	-81.12380635625001	20
-	-	AY842276	-	Clade 9	Cladonia verticillaris	Brazil: Alhandra, PB	terricolous	-7.4333333	-34.93333333333333	36
-	-	HE803040	-	Clade 9	Cladonia delavayi	India	saxicolous	29.3326944	80.09105555555556	1618
-	-	HE803041	-	Clade 9	Cladonia verticillata	India	terricolous	29.3984722	80.08530555555555	1890
-	-	AF345417	-	Clade 9	Cladonia rappii	USA: North Carolina	NA	NA	NA	NA
-	-	DQ482681	-	Clade 9	Cladonia subtenuis	USA: Georgia, Coffee County, Broxton Rocks	NA	NA	NA	NA
-	-	DQ482682	-	Clade 9	Cladonia subtenuis	USA: Florida, Okaloosa County, Rocky Bayou	NA	NA	NA	NA
-	-	EU008658	-	Clade 9	Cladia aggregata	Costa Rica	NA	NA	NA	NA
-	-	JN990651	-	Clade 9	Cladonia confusa	Brasil	terricolous	NA	NA	NA
-	-	JN990652	-	Clade 9	Cladonia confusa	Brasil	terricolous	NA	NA	NA
-	-	JN990653	-	Clade 9	Cladonia confusa	Brasil	NA	NA	NA	NA
-	-	JN990654	-	Clade 9	Cladonia crispatula	Brasil	terricolous	NA	NA	NA
-	-	JN990655	-	Clade 9	Cladonia crispatula	Brasil	NA	NA	NA	NA
-	-	JN990656	-	Clade 9	Cladonia crispatula	Brasil	terricolous	NA	NA	NA
-	-	JN990657	-	Clade 9	Cladonia crispatula	Brasil	terricolous	NA	NA	NA
-	-	JN990659	-	Clade 9	Cladonia didyma	Brasil	terricolous	NA	NA	NA
-	-	JQ359767	-	Clade 9	Cladonia confusa	NA	NA	NA	NA	NA
-	-	HE803030	-	Clade I1	Cladonia furcata	India	terricolous	31.9981389	77.41316666666667	2300
-	-	HE803034	-	Clade I1	Cladonia corymbescens	India	terricolous	29.970917	80.65547	2743
-	-	HE803031	-	Clade I1	Cladonia pyxidata	India	terricolous	30.3930278	79.31908333333332	3550
-	-	HE803032	-	Clade I1	Cladonia furcata	India	terricolous	30.3743056	79.31952777777778	3700
-	-	HE803035	-	Clade I2	Cladonia furcata	India	terricolous	30.4885833	79.21511111111111	3250
-	-	HE803037	-	Clade I2	Cladonia furcata	India	terricolous	31.7047778	77.27072222222222	3078
-	-	HE803043	-	IH2	Cladonia scabriuscula	India	terricolous	25.1336944	93.0098611111111	1014
-	-	HE803042	-	IH21B	Cladonia delavayi	India	saxicolous	29.3326944	80.09105555555556	1618
-	-	HE803045	-	IH22	Cladonia fruticulosa	India	terricolous	11.3959444	76.72683333333333	2607
-	-	HE803049	-	IH28	Cladonia cariosa	India	saxicolous	29.4229444	79.07491666666667	1745
-	-	HE803046	-	IH32	Cladonia fruticulosa	India	terricolous	11.40025	76.73505555555556	2607
-	-	HE803047	-	IH32b	Cladonia fruticulosa	India	terricolous	11.40025	76.73505555555556	2607
-	-	HE803044	-	IH8A	Cladonia verticillata	India	terricolous	29.3984722	80.08530555555555	1890
-	-	AF345428	-	IO18	Cladonia turgida	Russia	NA	NA	NA	NA
-	-	AF345429	-	IO24	Cladonia furcata	USA: Virginia/Maryland	NA	NA	NA	NA
-	-	AF345412	-	IO49	Cladonia uncialis	Finland	NA	NA	NA	NA
-	-	AF345414	-	IO50	Cladonia gracilis	Russia	NA	NA	NA	NA
-	-	EU008681	-	L55	Lepraria nigrocincta	Costa Rica	NA	NA	NA	NA
-	-	AF345425	-	MN057	Cladonia cristatella	USA: Alabama	NA	NA	NA	NA
-	-	AF345436	-	MN063	Cladonia pyxidata	Italy	NA	NA	NA	NA
-	-	AF345443	-	MN068	Cladonia pulviniformis	Guyana	NA	NA	NA	NA
-	-	AF345418	-	MN069	Cladonia spinea	Guyana	NA	NA	NA	NA
-	-	AF345416	-	Clade A14	Cladonia peltastica	Guyana	NA	NA	NA	NA
-	-	AF345419	-	MN075	Cladonia variegata	Guyana	NA	NA	NA	NA
-	-	AF345415	-	MN082	Cladonia didyma	USA: Alabama	NA	NA	NA	NA
-	-	AF345426	-	MN191	Cladonia parasitica	Canada: Nove Scotia	NA	44.415606	-65.088607	116
-	-	AY622830	-	MN274	Cladonia gracilis	Canada	saxicolous	53.940528	-101.1885375	271
-	-	AY622835	-	MN611	Cladonia rangiferina	Canada	saxicolous	53.940528	-101.18853759	271
-	-	DQ530191	-	Normore 4728	Cladonia pocillum	Canada	NA	NA	NA	NA
-	-	EU008692	-	P1	Pilophorus acicularis	USA	NA	NA	NA	NA
-	-	AY712705	-	RY1011	Cladonia prostrata	USA: Okaloosa County, FL	NA	30.43813	-86.416827	0
-	-	DQ482675	-	RY1128	Cladonia subtenuis	USA: North Carolina, Wake County, Lizard Lick	NA	NA	NA	NA
-	-	DQ482677	-	RY1157	Cladonia subtenuis	USA: Missouri, Bear Creek	NA	NA	NA	NA
-	-	DQ482674	-	Asterochloris lobophora	Cladonia subtenuis	USA: Arkansas, King's Bluff	NA	NA	NA	NA
-	-	DQ482676	-	RY1225	Cladonia subtenuis	USA: Pennsylvania, Lancaster County, New Texas	NA	NA	NA	NA
-	-	DQ482673	-	Asterochloris lobophora	Cladonia subtenuis	USA: Virginia, Amherst County, Naola	NA	NA	NA	NA
-	-	DQ482672	-	Asterochloris lobophora	Cladonia subtenuis	USA: Virginia, Amherst County, Naola	NA	NA	NA	NA
-	-	AY712703	-	RY581	Cladonia pachycladodes	USA: Martin County, FL	NA	27.945880206249246	-80.64584537744139	12
-	-	AY712711	-	RY616	Cladonia pachycladodes	USA: Martin County, FL	NA	27.945880206249246	-80.64584537744139	12
-	-	AY712702	-	RY666	Cladonia prostrata	USA: Highlands County, FL	NA	27.06487465117238	-80.95763814335939	7
-	-	AY712701	-	RY765	Cladonia perforata	USA: Polk County, FL	NA	27.617719070802455	-81.12380635625001	20
-	-	AY712706	-	RY836	Cladonia pachycladodes	USA: Highlands County, FL	NA	27.06487465117238	-80.95763814335939	7
-	-	AY712704	-	RY967	Cladonia pachycladodes	USA: Highlands County, FL	NA	26.67163739599027	-80.88760030156251	6
-	-	KX051237	-	Asterochloris sejongensis	Sphaerophorus globosus	King George Island, Antarctica	NA	-62.2167833	-58.76133333333333	0
-	-	KX051238	-	Asterochloris sejongensis	Cladonia pyxidata	King George Island, Antarctica	terricolous	-62.2167833	-58.76133333333333	0
-	-	MH415380	-	Clade StA1	Stereocaulon sp.	Denmark, Faroe Islands	NA	62.3173611	-7.1034444	0
-	-	MH415386	-	Clade StA1	Stereocaulon rivulorum	Denmark, Faroe Islands	muscicolous	62.3501667	-6.5978611	0
-	-	MH415388	-	Clade StA1	Stereocaulon cf. rivulorum	Denmark, Faroe Islands	NA	62.3428	-6.5876	0
-	-	MH415389	-	Clade StA1	Stereocaulon cf. rivulorum	Denmark, Faroe Islands	NA	62.3428	-6.5876	0
-	-	MH415390	-	Clade StA1	Stereocaulon rivulorum	Denmark, Faroe Islands	NA	62.3428	-6.5876	0
-	-	MH415435	-	Clade StA1	Stereocaulon cf. rivulorum	Denmark, Faroe Islands	NA	62.0196944	-6.8256111	0
-	-	MH415436	-	Clade StA1	Stereocaulon vesuvianum	Denmark, Faroe Islands	saxicolous	62.0196944	-6.8256111	0
-	-	MH415437	-	Clade StA1	Stereocaulon rivulorum	Denmark, Faroe Islands	NA	62.0196944	-6.8256111	0
-	-	MH415385	-	Clade StA1	Stereocaulon vesuvianum	Denmark, Faroe Islands	saxicolous	62.2362778	-6.6166389	42
-	-	MH415430	-	Clade StA1	Stereocaulon rivulorum	Denmark, Faroe Islands	NA	62.2634	-6.6171	80
-	-	MH415431	-	Clade StA1	Stereocaulon rivulorum	Denmark, Faroe Islands	NA	62.2634	-6.6171	80
-	-	MH415432	-	Clade StA1	Stereocaulon vesuvianum	Denmark, Faroe Islands	saxicolous	62.2634	-6.6171	80
-	-	MH415429	-	Clade StA1	Stereocaulon vesuvianum	Denmark, Faroe Islands	saxicolous	62.2974722	-6.6772222	100
-	-	MH415375	-	Clade StA1	Stereocaulon rivulorum	Denmark, Faroe Islands	NA	62.0196944	-6.8256111	204
-	-	MH415376	-	Clade StA1	Stereocaulon vesuvianum	Denmark, Faroe Islands	saxicolous	62.0196944	-6.8256111	204
-	-	MH415381	-	Clade StA1	Stereocaulon cf. vesuvianum	Denmark, Faroe Islands	NA	62.0334167	-6.8348056	278
-	-	MH415382	-	Clade StA1	Stereocaulon rivulorum	Denmark, Faroe Islands	NA	62.0334167	-6.8348056	278
-	-	MH415384	-	Clade StA1	Stereocaulon vesuvianum	Denmark, Faroe Islands	saxicolous	62.0334167	-6.8348056	278
-	-	MH415258	-	Clade StA2	Stereocaulon alpinum	Iceland	muscicolous	64.12108	-19.78241	238
-	-	KT989915.	-	Clade StA2	Cladonia coccifera	Austria: Stubalpe	NA	NA	NA	NA
-	-	KT989919	-	Clade StA3	Cladonia coccifera	Austria: Stubalpe	NA	NA	NA	NA
-	-	KT989920	-	Clade StA3	Cladonia coccifera	Czech Republic: Krkonose Mts.	NA	NA	NA	NA
-	-	KT989921	-	Clade StA3	Cladonia coccifera	Austria: Nockberge	NA	NA	NA	NA
-	-	MH415357	-	Clade StA4	Stereocaulon alpinum	Greenland, Disko Island	terricolous	69.240059	-53.542775	0
-	-	MH415364	-	Clade StA4	Stereocaulon alpinum	Greenland, Ilulissat	terricolous	69.240059	-53.542775	0
-	-	MH415330	-	Clade StA4	Stereocaulon sp.	Alaska	terricolous	60.574207	-149.572659	406
-	-	MH415281	-	Clade StA4	Stereocaulon sp.	Sweden, Vålådalen Nature	saxicolous	63.040556	12.898611	894
-	-	KT989905	-	Clade StA4	Cladonia coccifera	Czech Republic: Krkonose Mts.	NA	NA	NA	NA
-	-	MH415410	-	Clade StA5	Stereocaulon alpinum	Canada	terricolous	49.693841	-125.364318	1168
-	-	MH415411	-	Clade StA5	Stereocaulon cf. grande	Canada	terricolous	49.693841	-125.364318	1168
-	-	MH415412	-	Clade StA5	Stereocaulon cf. grande	Canada	terricolous	49.693841	-125.364318	1168
-	-	MH415282	-	Clade StA5	Stereocaulon vesuvianum	Georgia	terricolous	42.65884	44.57376	2948
-	-	MH415221	-	Clade StA5	Stereocaulon alpinum	Georgia	corticolous	42.502235	45.355319	2996
-	-	MH415222	-	Clade StA5	Stereocaulon alpinum	Georgia	corticolous	42.502235	45.355319	2996
-	-	MH415224	-	Clade StA5	Stereocaulon alpinum	Georgia	corticolous	42.502235	45.355319	2996
-	-	MH415225	-	Clade StA5	Stereocaulon alpinum	Georgia	corticolous	42.502235	45.355319	2996
-	-	MH415291	-	Clade StA5	Stereocaulon cf. alpinum	Georgia	terricolous	42.502231	45.291398	3274
-	-	AF345427	-	Clade StA5	Cladonia subulata	Germany	NA	NA	NA	NA
-	-	MH415273	-	Clade StA6	Stereocaulon cf. alpinum	Argentina, Santa Cruz	terricolous	-49.266667	-72.983333	990
-	-	KF907657	-	URa14	Psora decipiens	Austria: Hochtor	NA	47.0833	12.85	2200
-	-	KF907659	-	URa14	Peltigera rufescens	Austria: Hochtor	NA	47.0833	12.85	2200
-	-	KF907660	-	URa14	Psora decipiens	Austria: Hochtor	NA	47.0833	12.85	2200
-	-	KF907658	-	URa15	Fulgensia bracteata ssp. deformis	Austria: Hochtor	NA	47.0833	12.85	2200
-	-	KF907661	-	URa15	Fulgensia bracteata ssp. deformis	Austria: Hochtor	NA	47.0833	12.85	2200
-	-	KF907662	-	URa16	Gyalolechia fulgens	Germany: Ruine Homburg	NA	50.0167	9.8	295
-	-	KF907663	-	URa16	Peltigera rufescens	Germany: Ruine Homburg	NA	50.0167	9.8	295
-	-	KF907664	-	URa16	Peltigera rufescens	Germany: Ruine Homburg	NA	50.0167	9.8	295
-	-	KF907665	-	URa16	Peltigera rufescens	Germany: Ruine Homburg	NA	50.0167	9.8	295
-	-	KF907645	-	URa17	Psora decipiens	Germany: Ruine Homburg	NA	50.0167	9.8	295
-	-	KF907646	-	URa17	Psora decipiens	Germany: Ruine Homburg	NA	50.0167	9.8	295
-	-	KF907647	-	URa17	Psora decipiens	Sweden: Gynge Alvar	NA	56.5421	16.4784	43
-	-	KF907648	-	URa17	Psora decipiens	Sweden: Gynge Alvar	NA	56.5421	16.4784	43
-	-	KF907649	-	URa17	Psora decipiens	Sweden: Gynge Alvar	NA	56.5421	16.4784	43
-	-	KF907650	-	URa17	Psora decipiens	Sweden: Gynge Alvar	NA	56.5421	16.4784	43
-	-	KF907651	-	URa17	Psora decipiens	Sweden: Gynge Alvar	NA	56.5421	16.4784	43
-	-	KF907652	-	URa17	Psora decipiens	Sweden: Gynge Alvar	NA	56.5421	16.4784	43
-	-	KF907653	-	URa17	Psora decipiens	Sweden: Gynge Alvar	NA	56.5421	16.4784	43
-	-	KF907654	-	URa17	Psora decipiens	Sweden: Gynge Alvar	NA	56.5421	16.4784	43
-	-	KF907655	-	URa17	Psora decipiens	Sweden: Gynge Alvar	NA	56.5421	16.4784	43
-	-	KF907656	-	URa17	Psora decipiens	Sweden: Gynge Alvar	NA	56.5421	16.4784	43
-	-	KF907666	-	URa17	Psora decipiens	Germany: Ruine Homburg	NA	50.0167	9.8	295
-	-	KF907667	-	URa17	Psora decipiens	Germany: Ruine Homburg	NA	50.0167	9.8	295
-	-	KF907668	-	URa17	Psora decipiens	Germany: Ruine Homburg	NA	50.0167	9.8	295
-	-	KF907670	-	URa17	Psora decipiens	Germany: Ruine Homburg	NA	50.0167	9.8	295
-	-	KF907671	-	URa17	Psora decipiens	Germany: Ruine Homburg	NA	50.0167	9.8	295
